# Supplementary material for: Distribution of ancestral proto-Actinopterygian chromosome arms within the genomes of 4R-derivative salmonid fishes (Rainbow trout and Atlantic salmon)
Source: PubMed Central journal article supplement (PMC2632648; doi:10.1186/1471-2164-9-557), 2008-11-25

**Supplementary Figure 2:** Atlantic salmon merged female genetic map depicting all linkage groups numbered in sequence. The 'f' suffix following the linkage group name indicates it is a female map. Map distances are indicated as observed recombination distances (  $\Theta$  ) where 1% recombination = 1 cM. Homologous regions within Atlantic salmon to their respective rainbow trout linkage groups are indicated to the right of each linkage group. Atlantic salmon chromosomes ranked according to size (Phillips et al. unpublished) are indicated below each linkage group designation.

# AS-1f

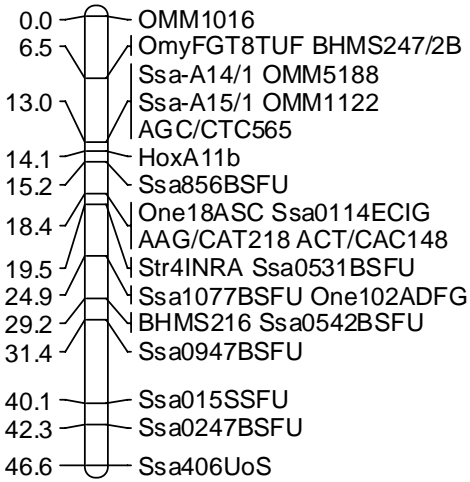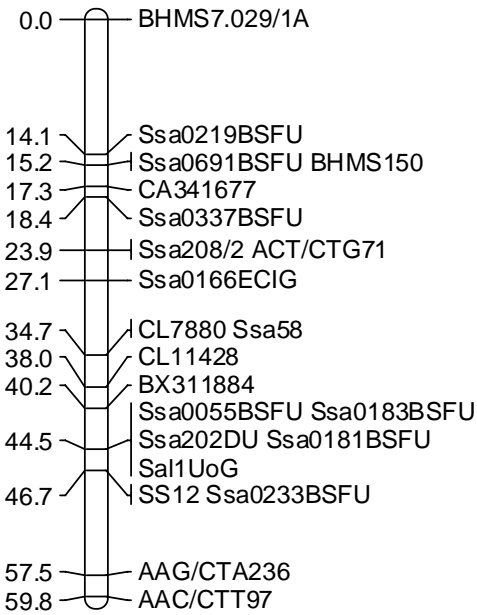

# AS-2f

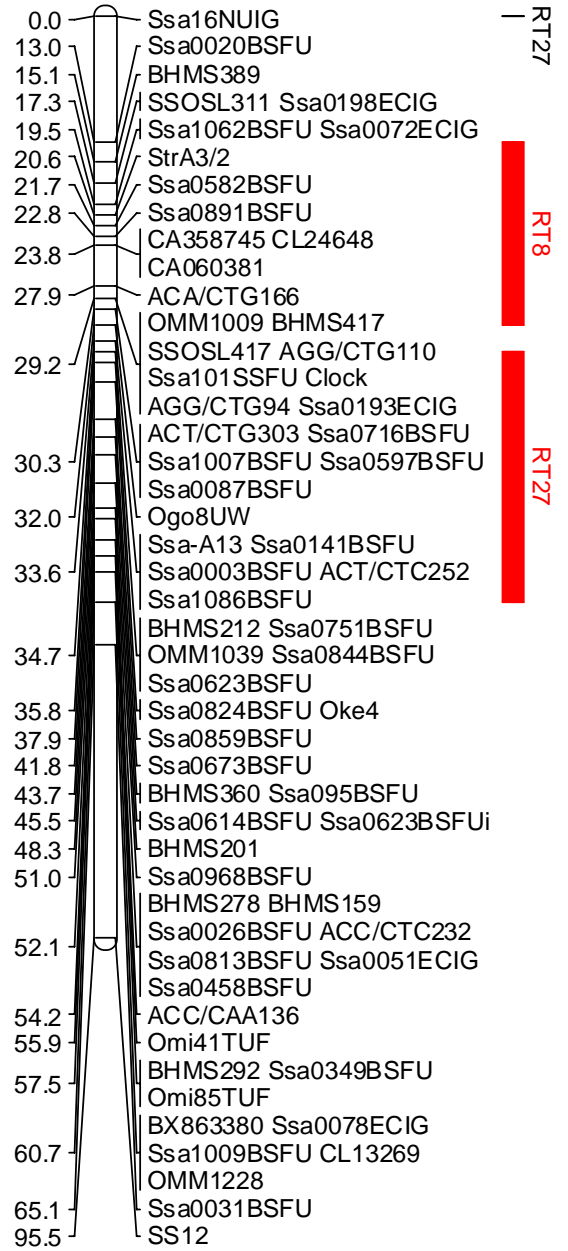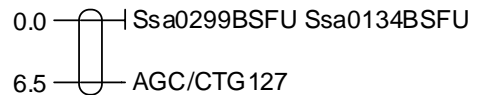

# AS-3f

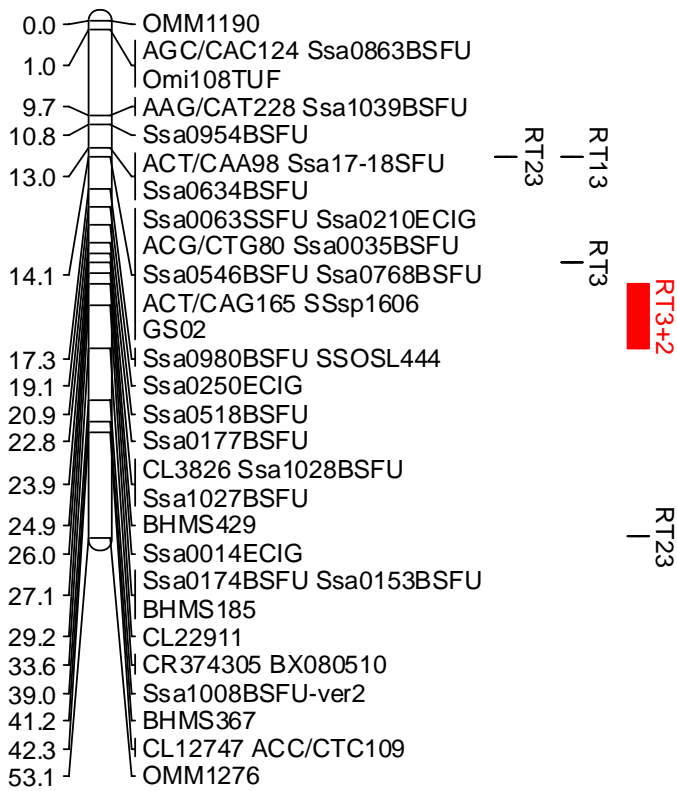

# AS-4f

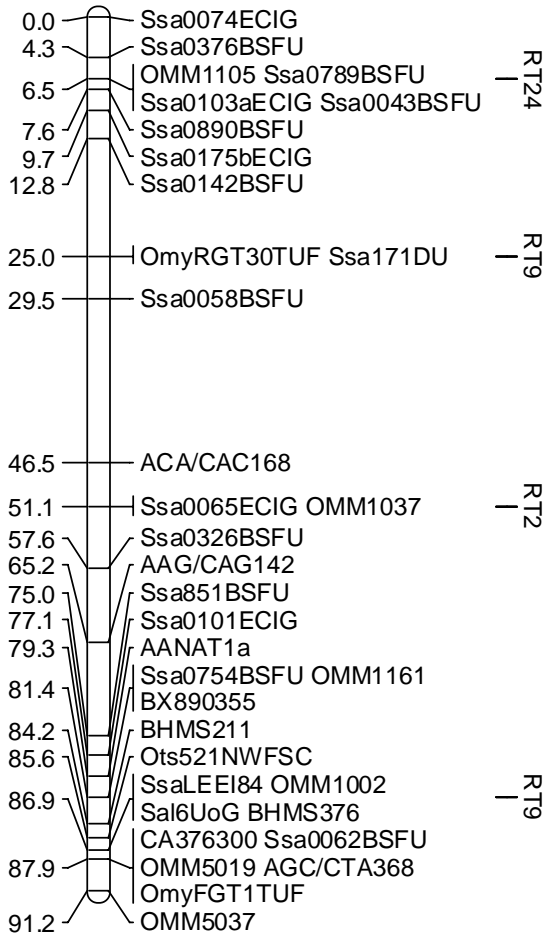

RT24

RT9

RT2

RT9

RT2

RT9

RT5

RT9

RT2

0.0 Omy27INRA

8.7 Ssa-A12 ACT/CAA115

9.7 HSP(VMS)

# AS-5f

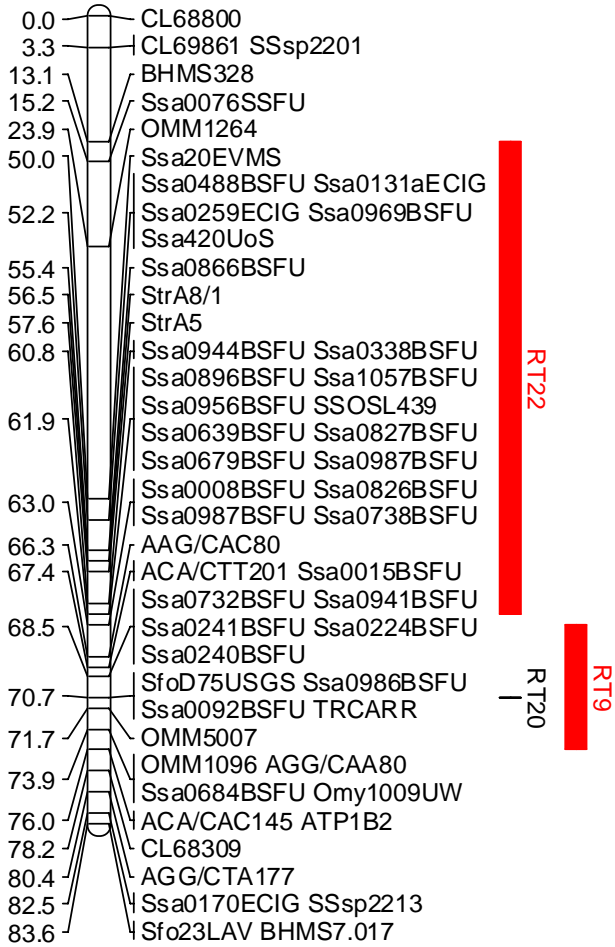

# AS-6f

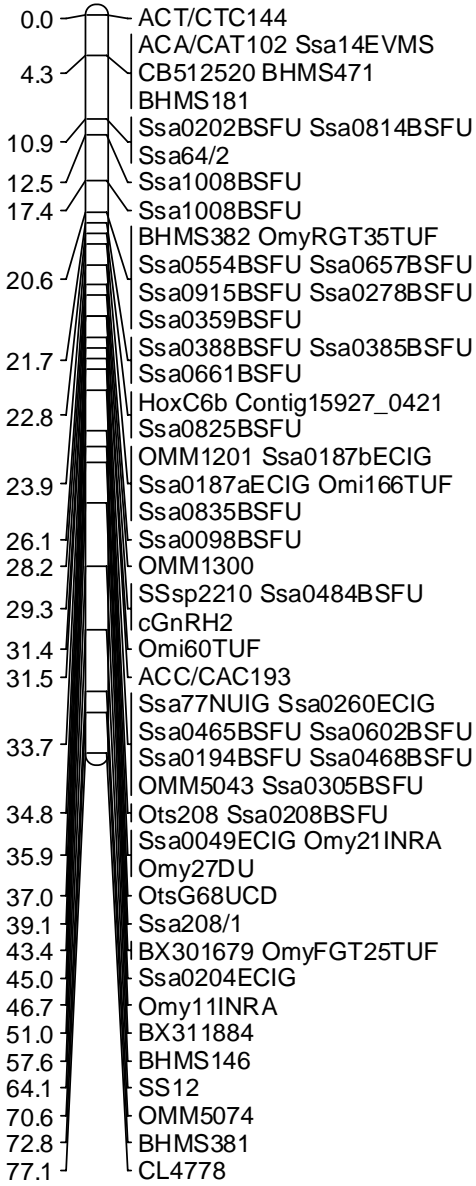

RT12

RT29

RT2

RT29

RT2

RT29

# AS-7f

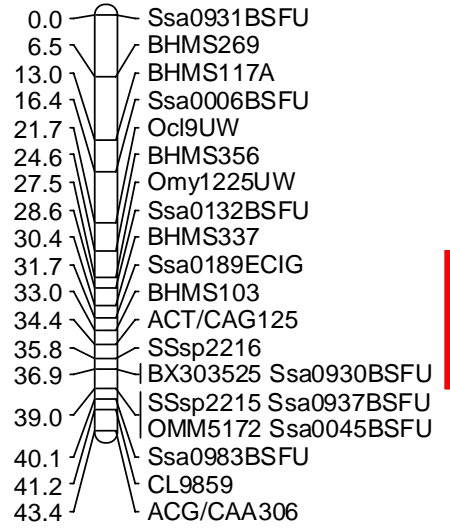

RT10

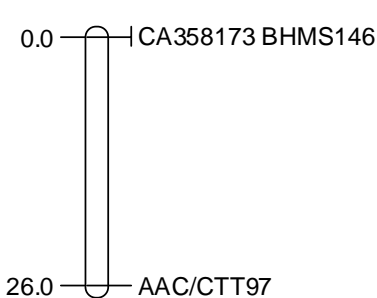

RT2

RT29

## AS-8f

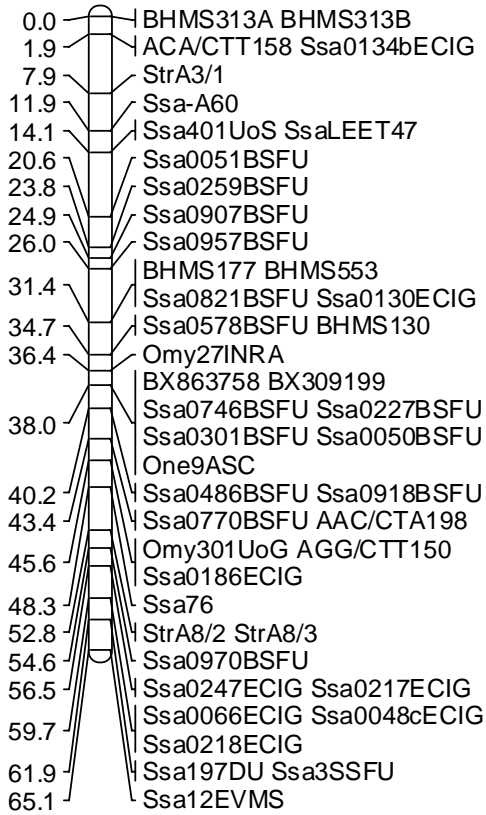

RT24 RT2

RT21

## AS-9f

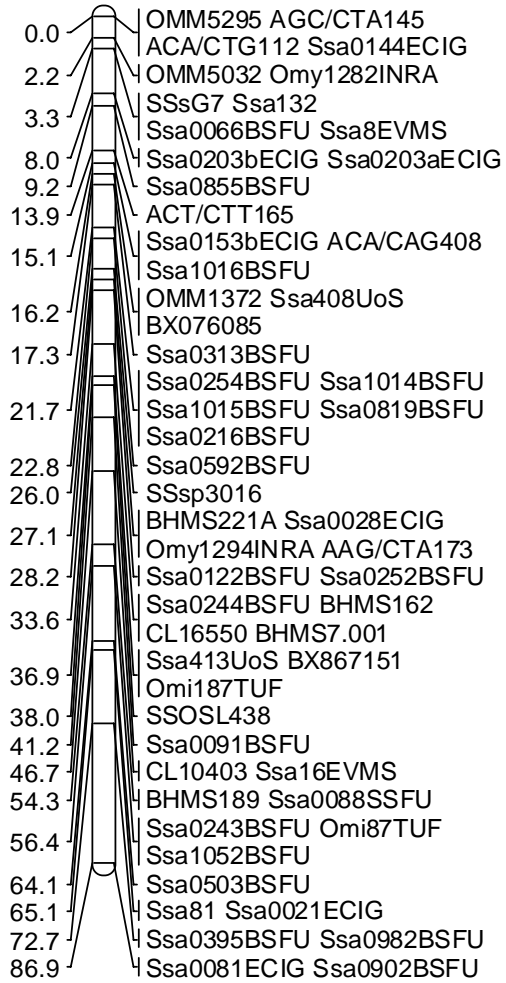

RT1

RT10

RT18+2(L25)

RT18(L25)

RT18(L44)

# AS-10f

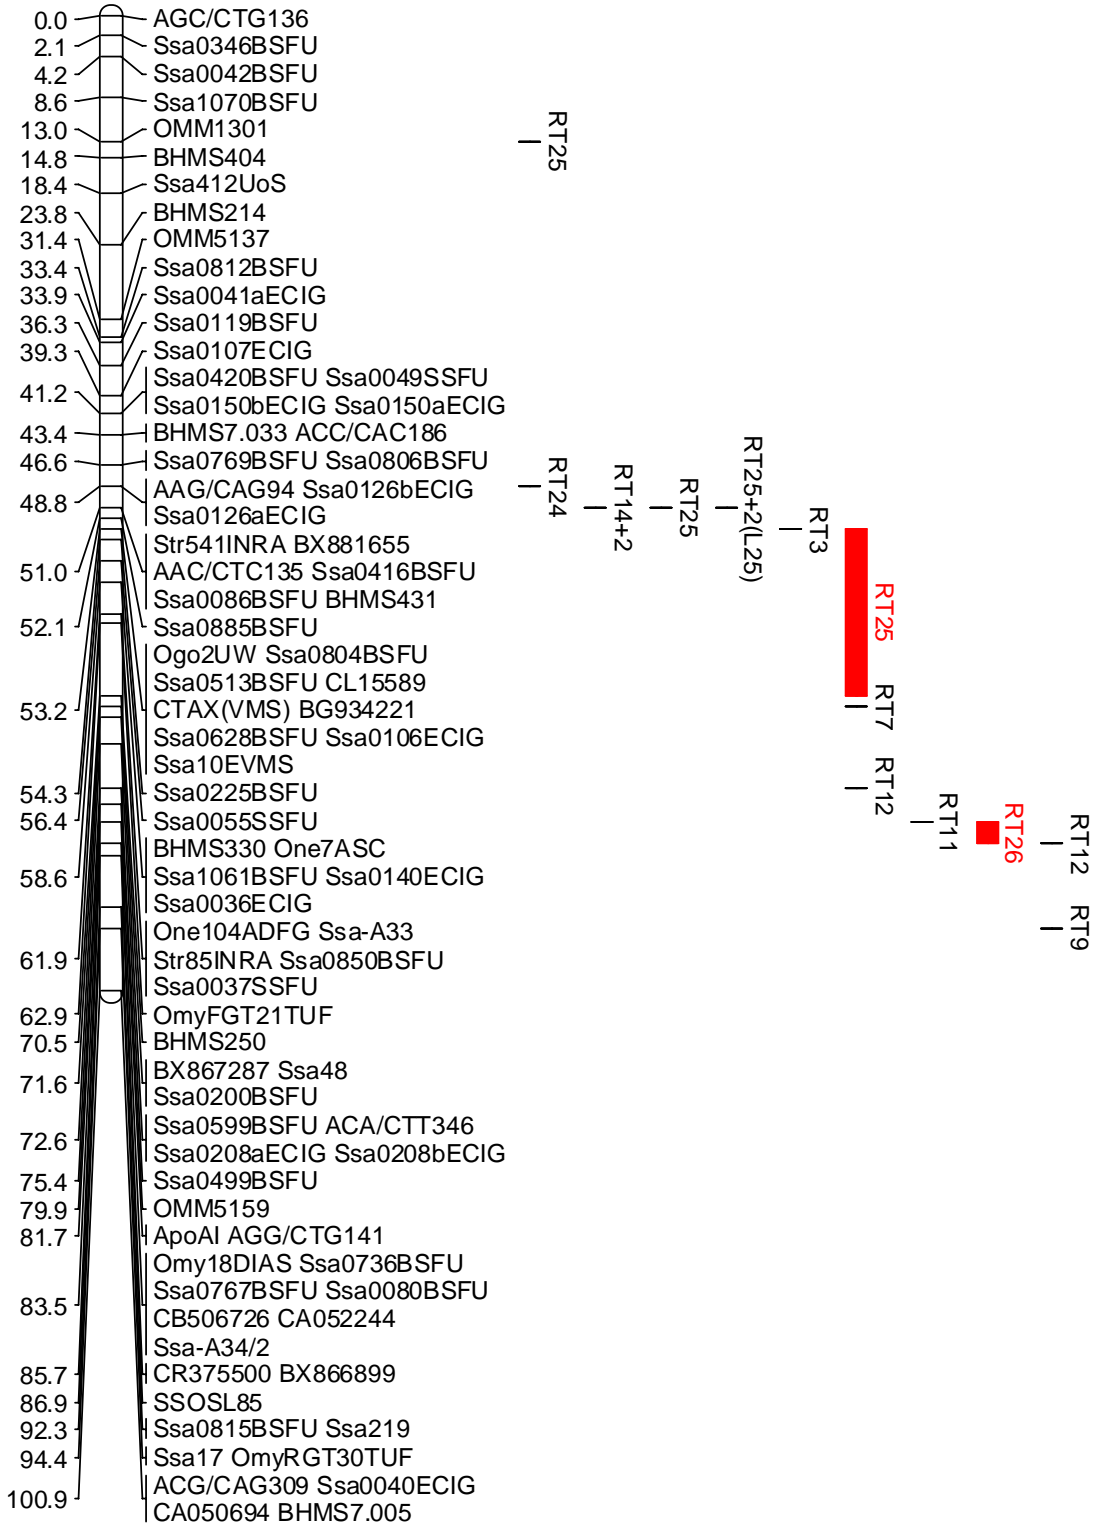



# AS-11f

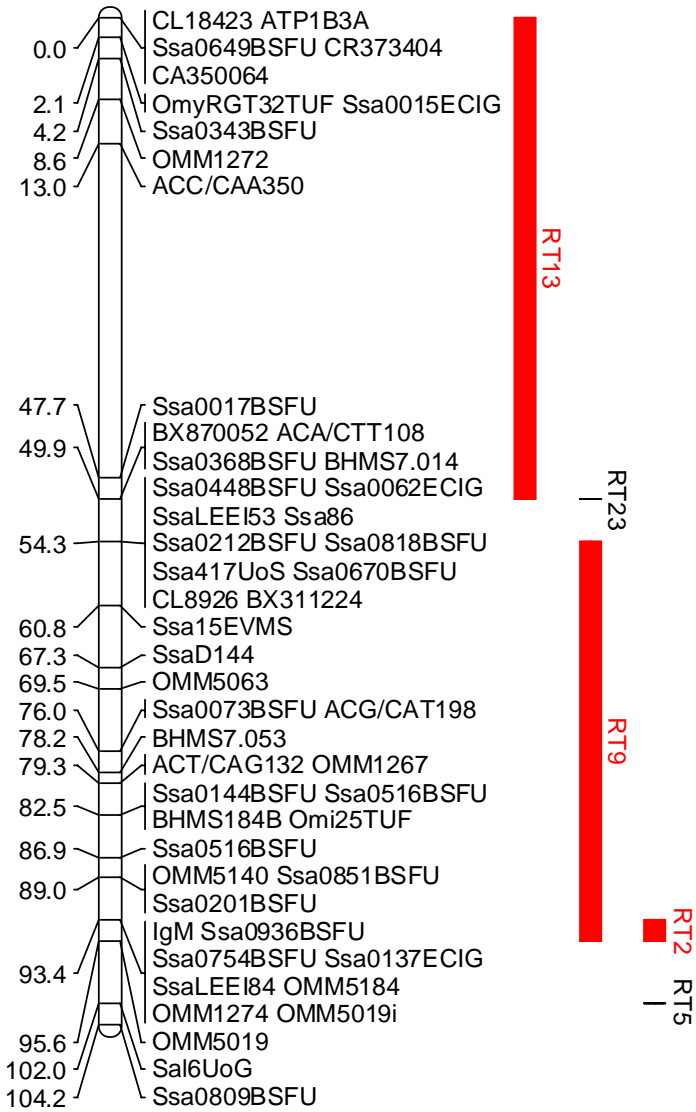

# AS-12f

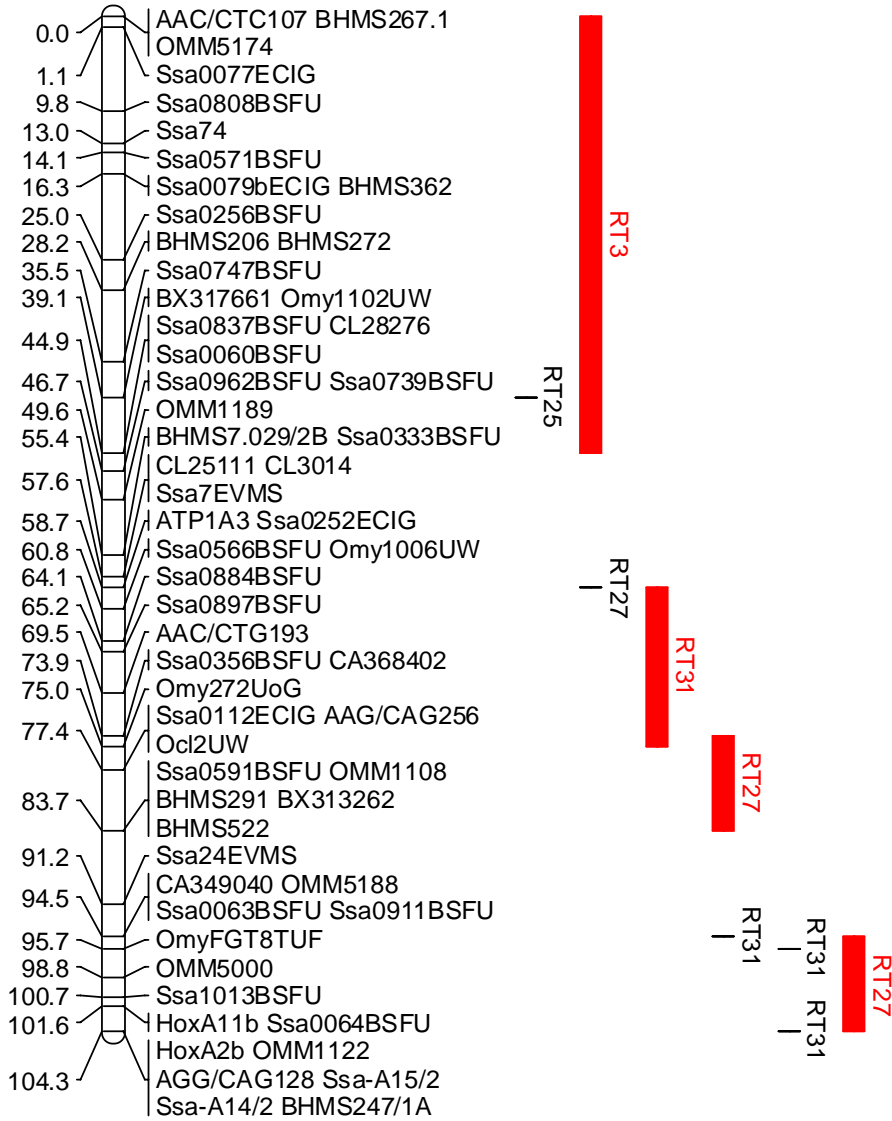

# AS-13f

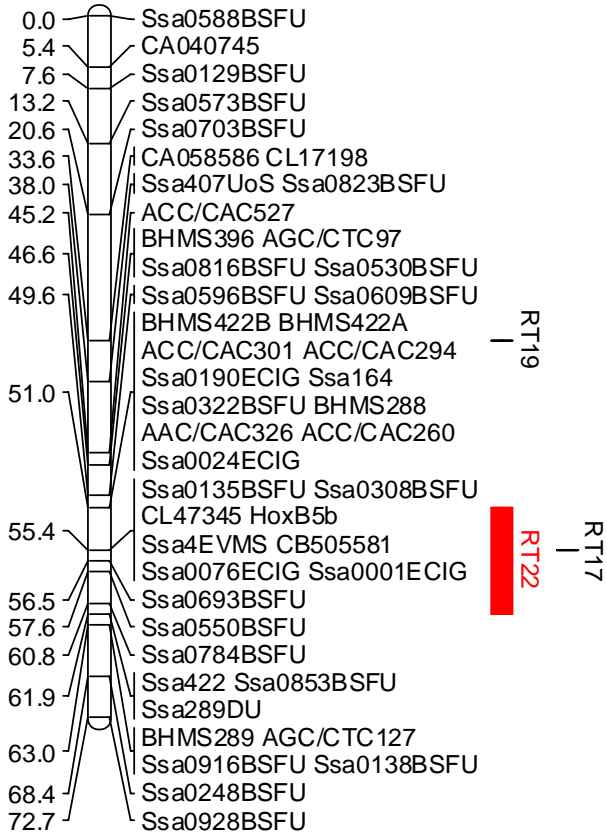

# AS-14f

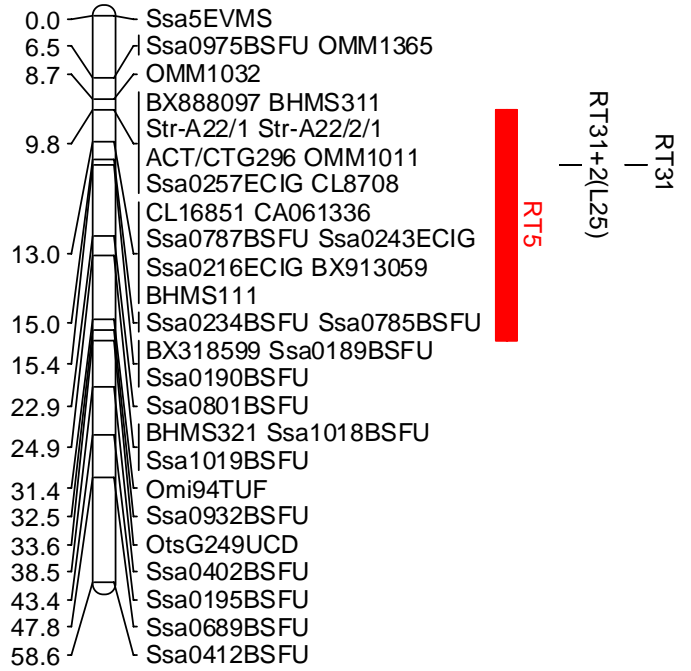

# AS-15f

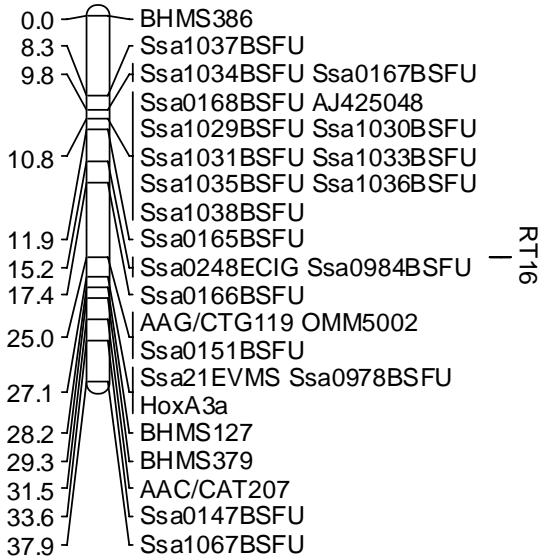

# AS-16f

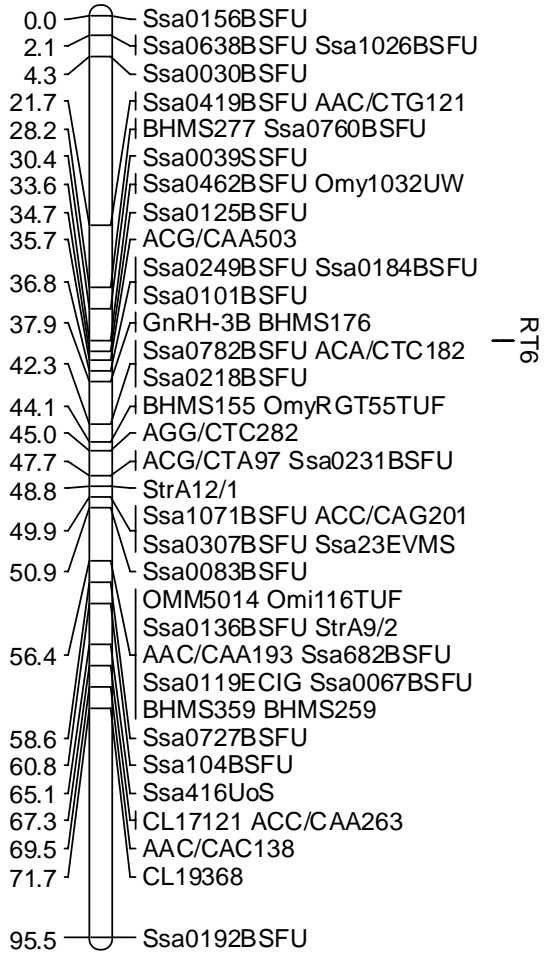

# AS-17

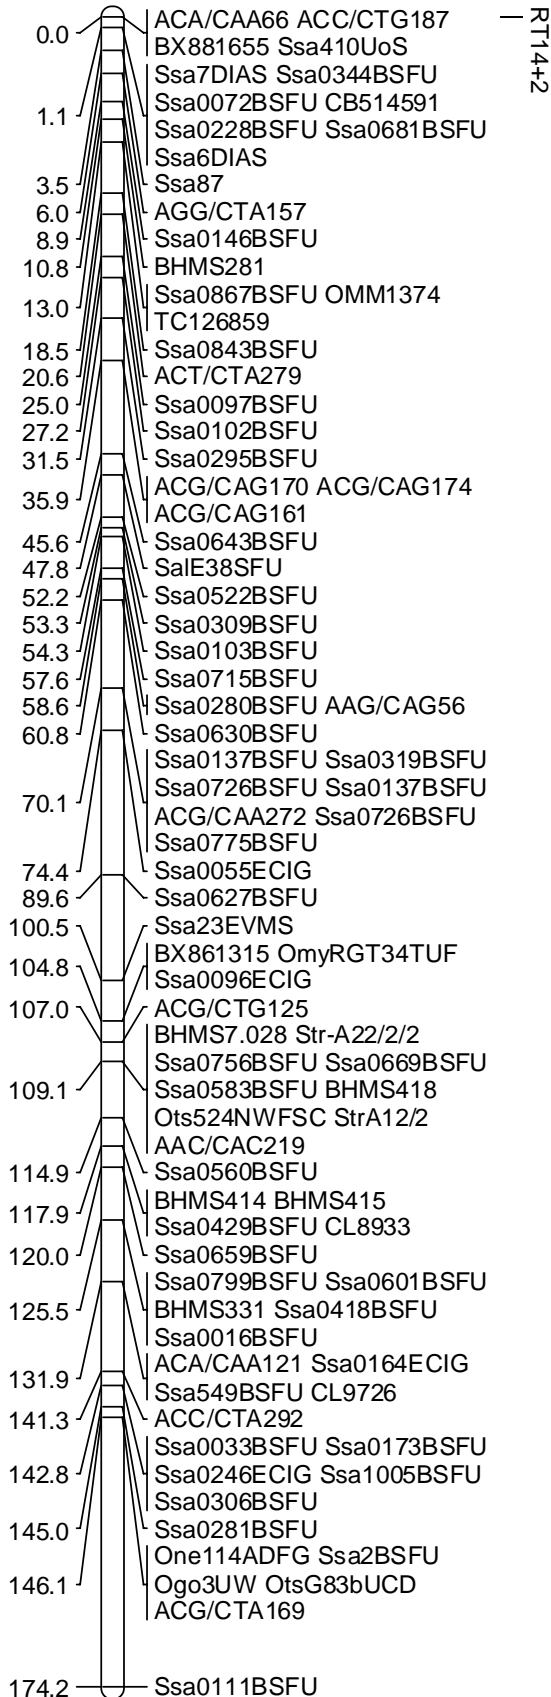

# AS-18f

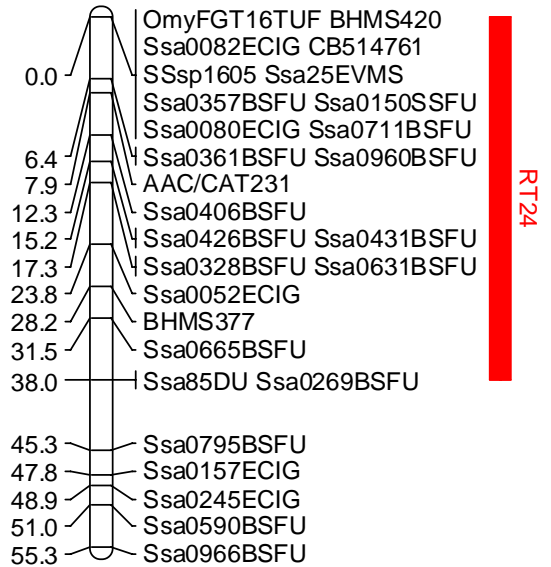

## AS-19f

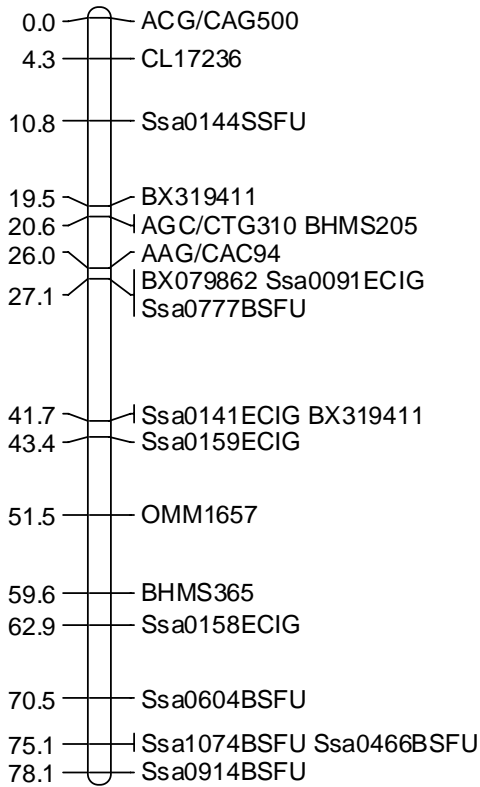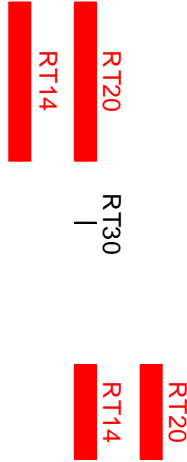

## AS-20f

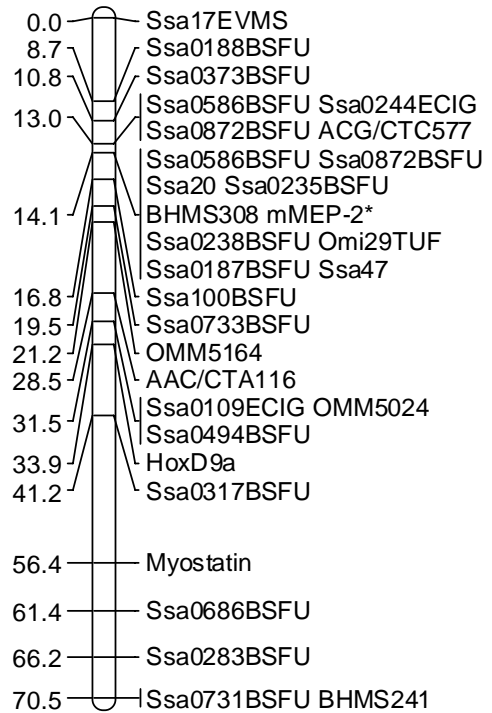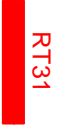

## AS-21f

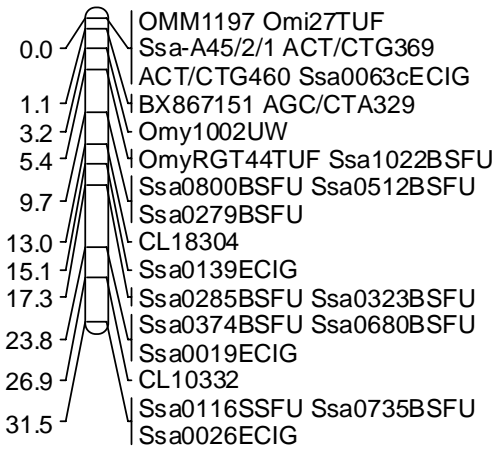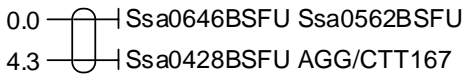

RT10

RT18

## AS-22f

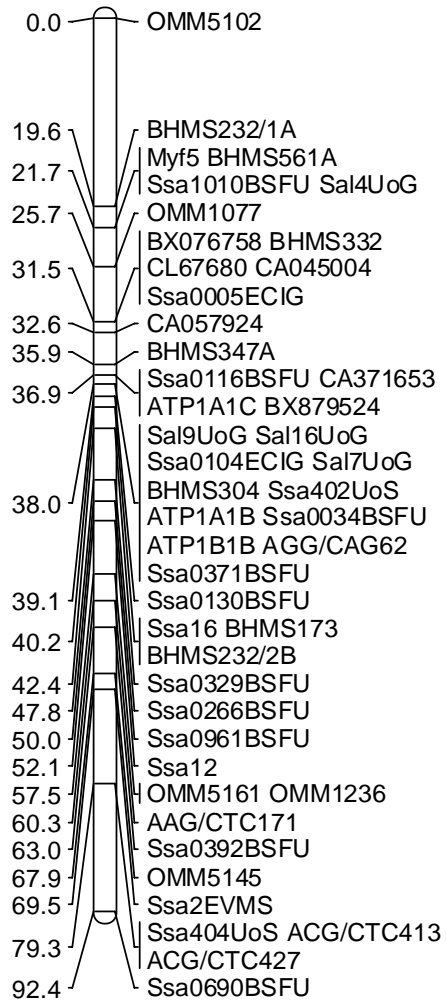

RT7

RT15

RT7

RT16

RT16

RT12

# AS-23f

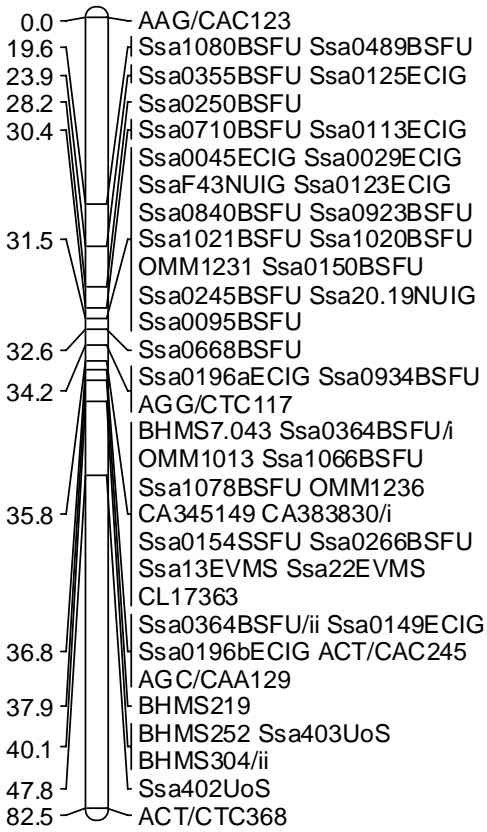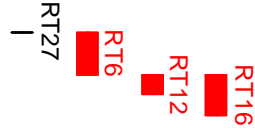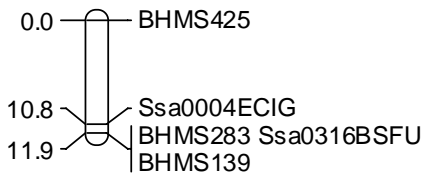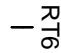

# AS-24f

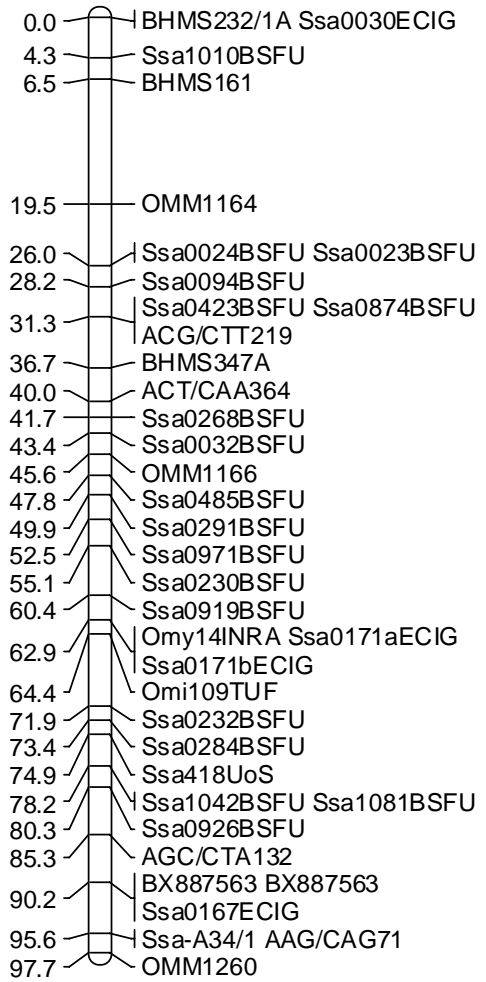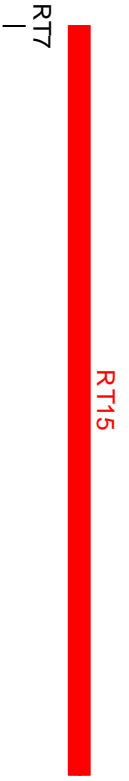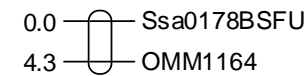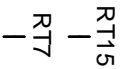



# AS-25f

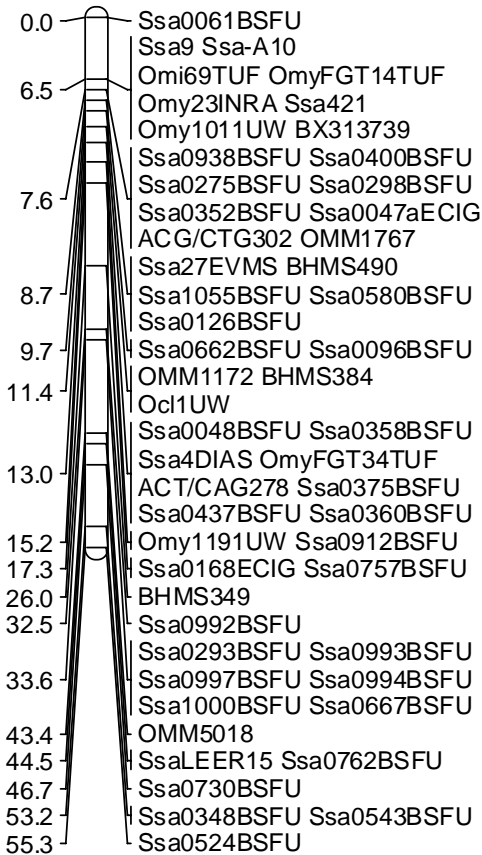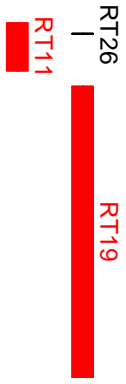

# AS-28f

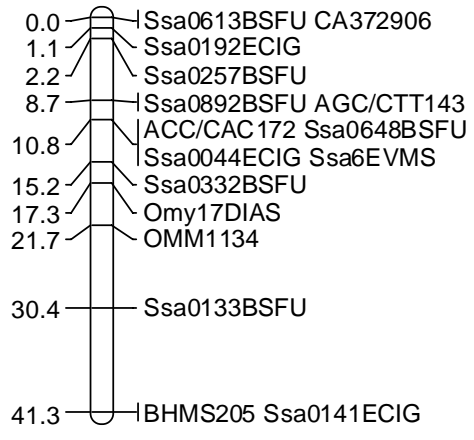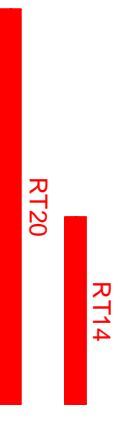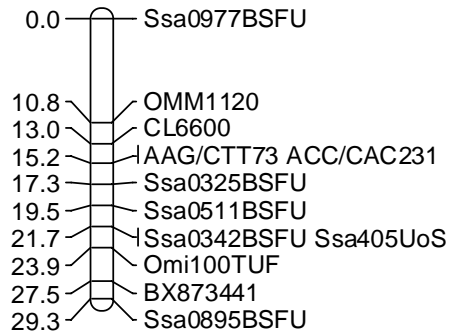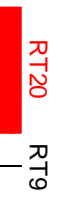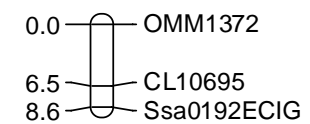

### AS-31f

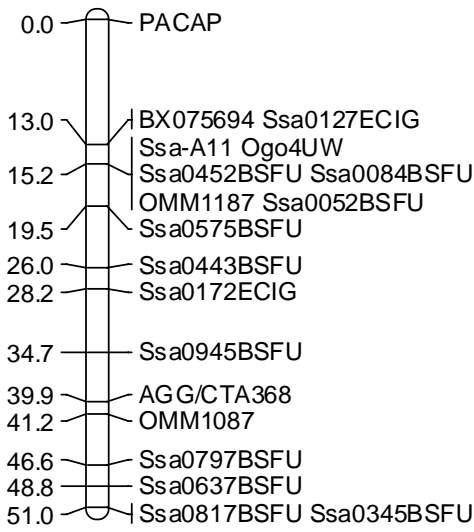

### AS-32f

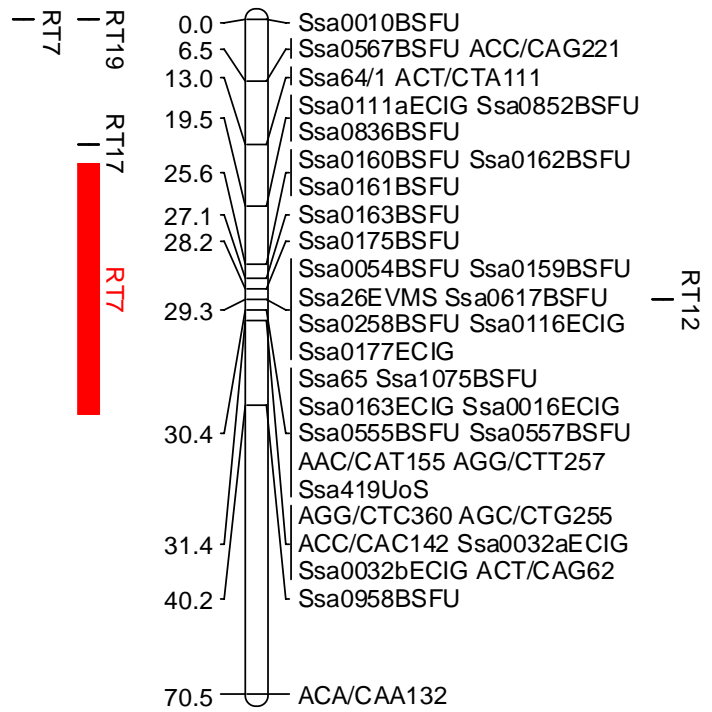

# AS-33f

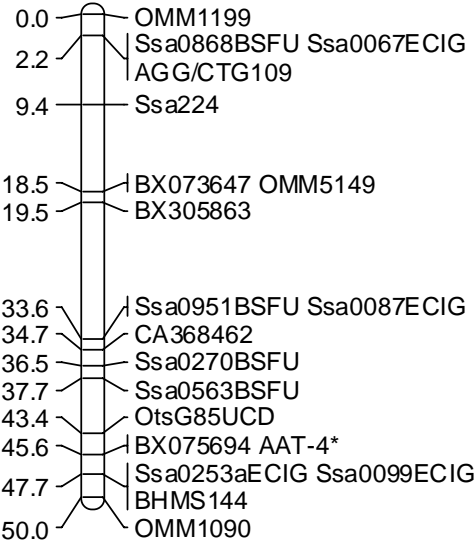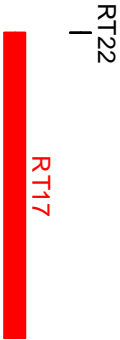

Supplement: 1471-2164-9-557-S12.pdf [file 1471-2164-9-557-S12.pdf]
