# Supplementary material for: Distribution of ancestral proto-Actinopterygian chromosome arms within the genomes of 4R-derivative salmonid fishes (Rainbow trout and Atlantic salmon)
Source: PubMed Central journal article supplement (PMC2632648; doi:10.1186/1471-2164-9-557), 2008-11-25
Supplement: 1471-2164-9-557-S11.pdf [file 1471-2164-9-557-S11.pdf]

**Supplementary Figure 1:** Rainbow trout merged female genetic map depicting all linkage groups numbered in sequence. The 'f' suffix following the linkage group name indicates it is a female map. Map distances are indicated as observed recombination distances (  $\Theta$  ) where 1% recombination = 1 cM. Homologous regions within rainbow trout to their respective Atlantic salmon linkage groups are indicated to the right of each linkage group. Rainbow trout chromosomes ranked according to size (Phillips et al. 2006) are indicated below each linkage group designation.

# RT-1f

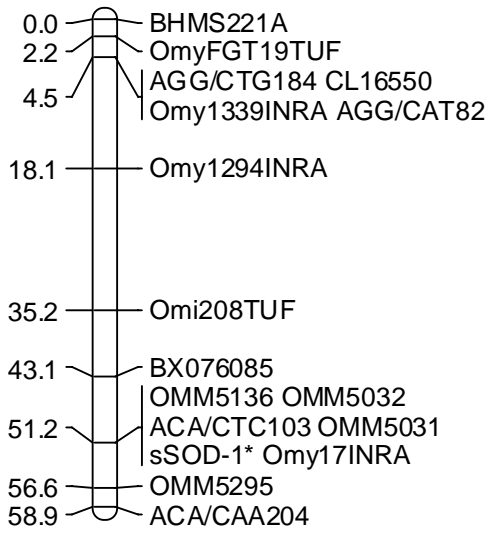

## Chromosome Sex

# RT-2f

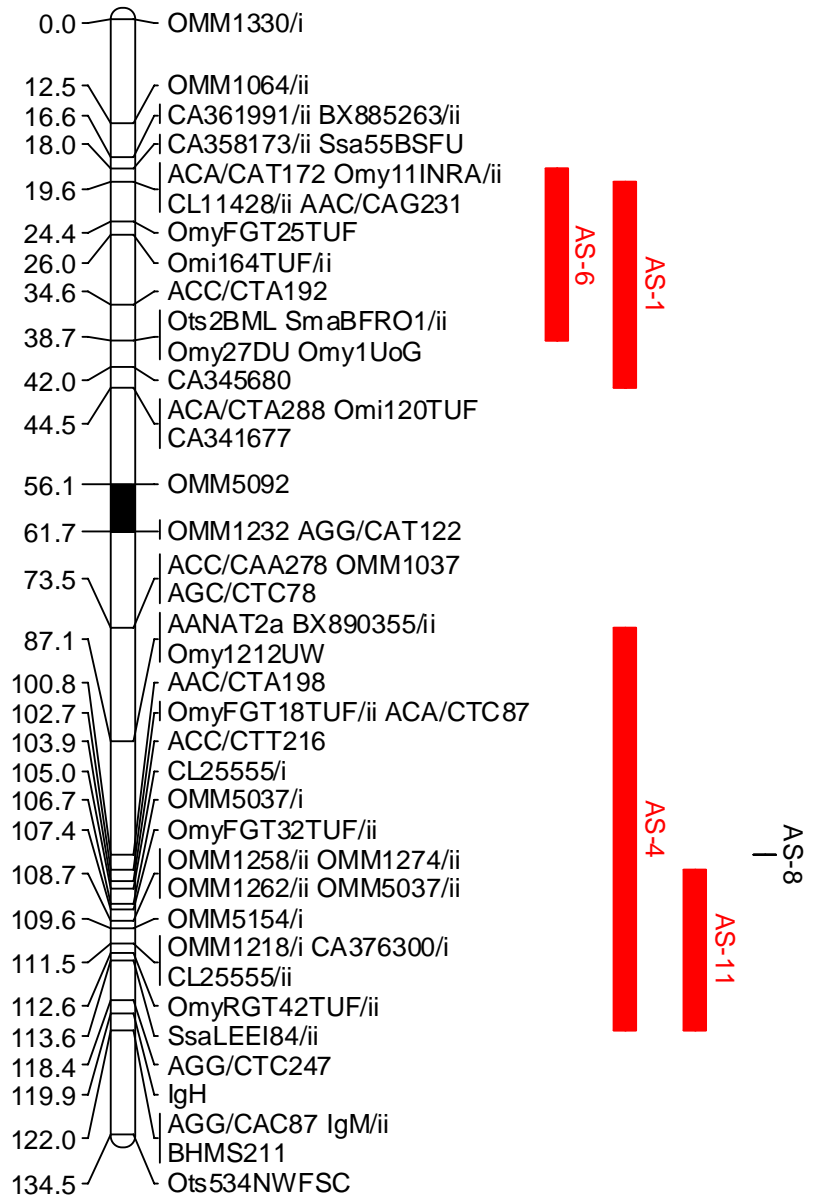

## Chromosome 13

### RT-3f

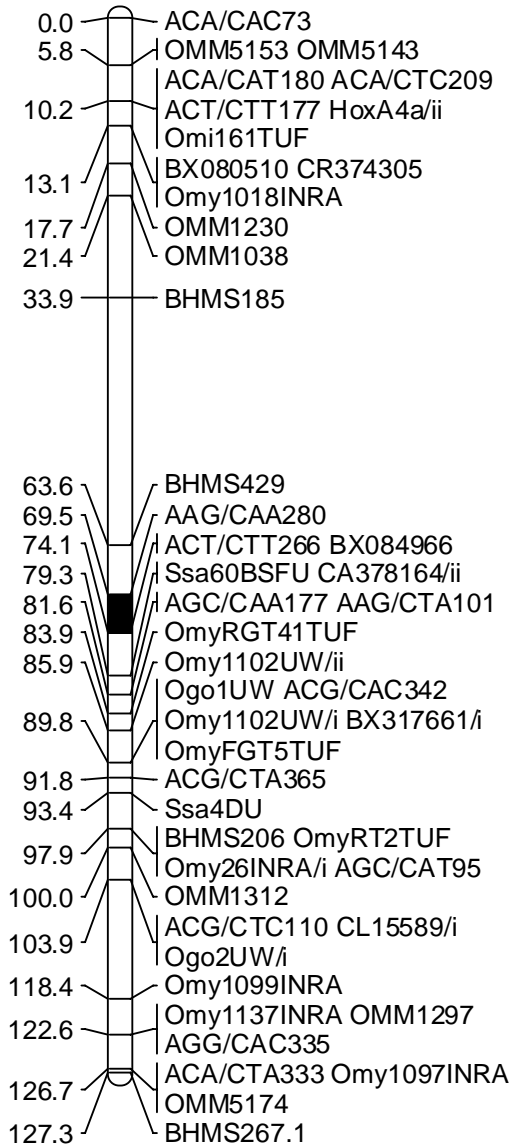

### Chromosome 14

### RT-5f

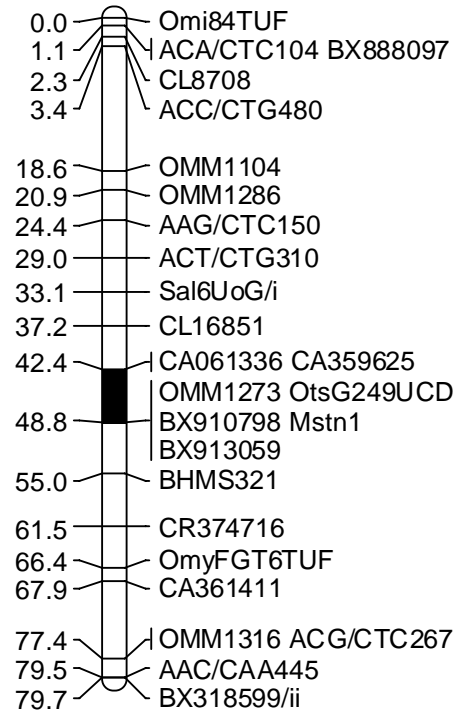

### Chromosome 22

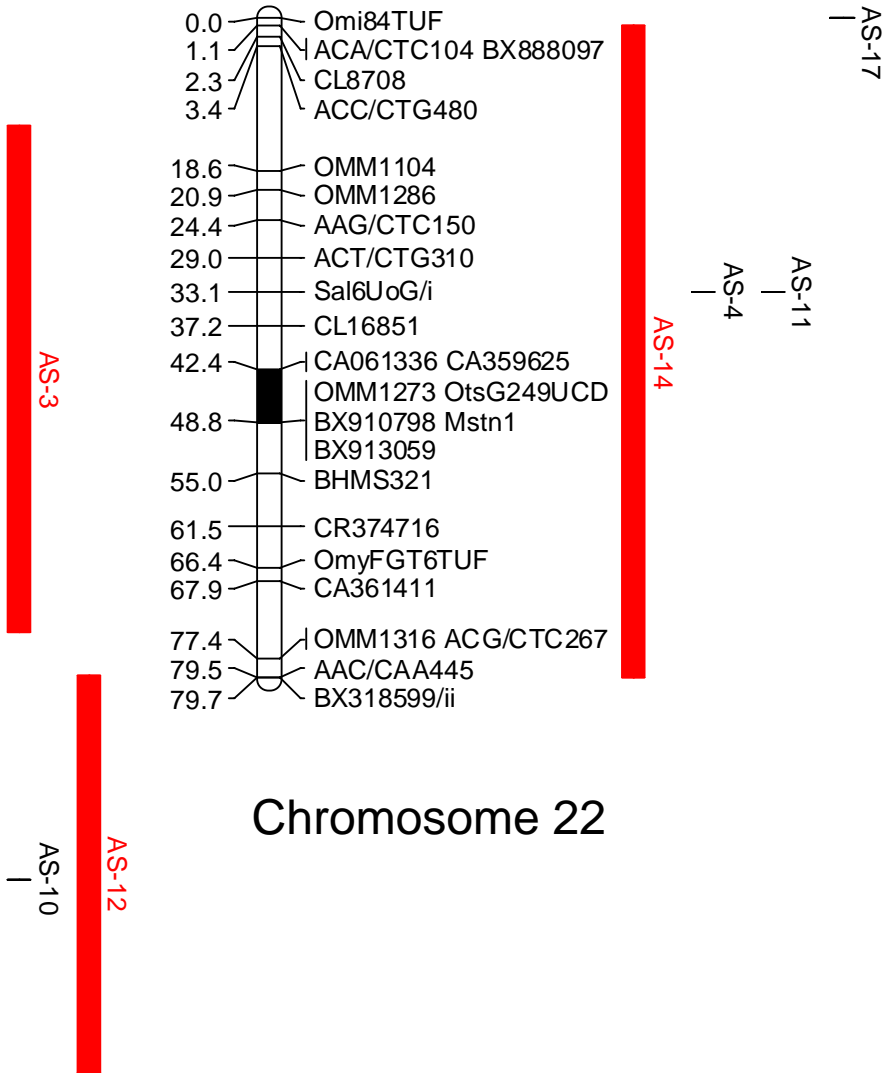

## RT-6f

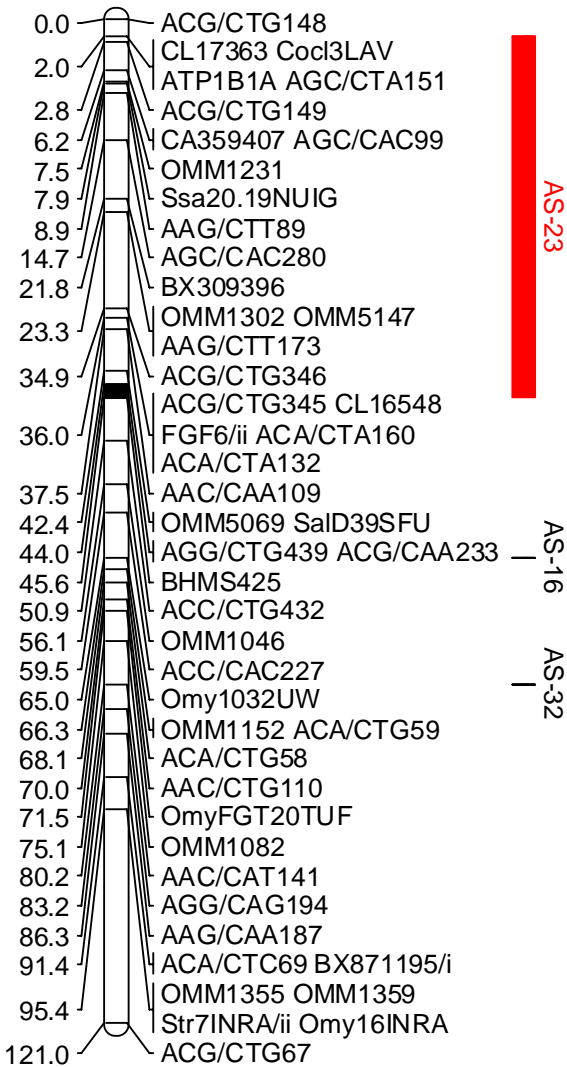

Chromosome 1

## RT-7f

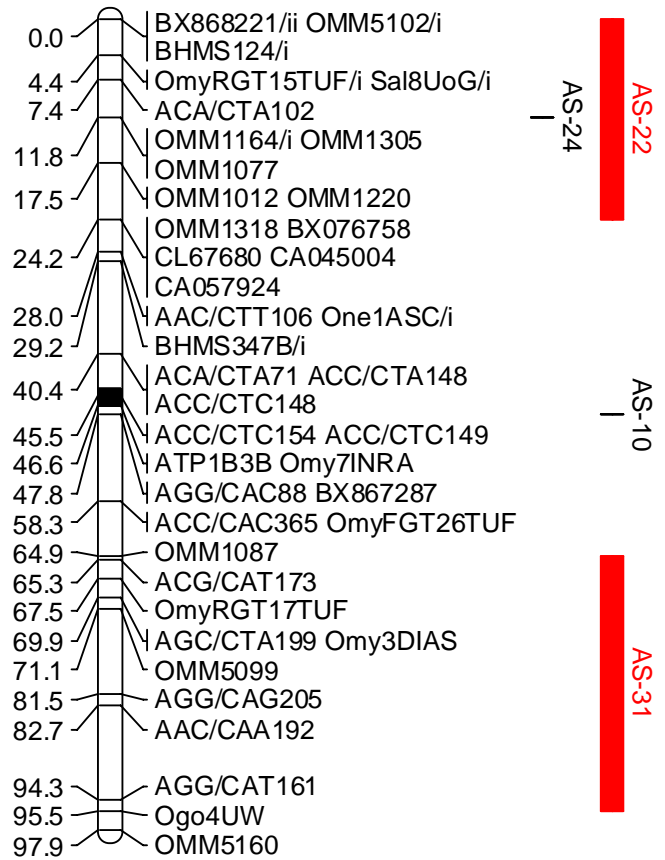

Chromosome 15

# RT-8f

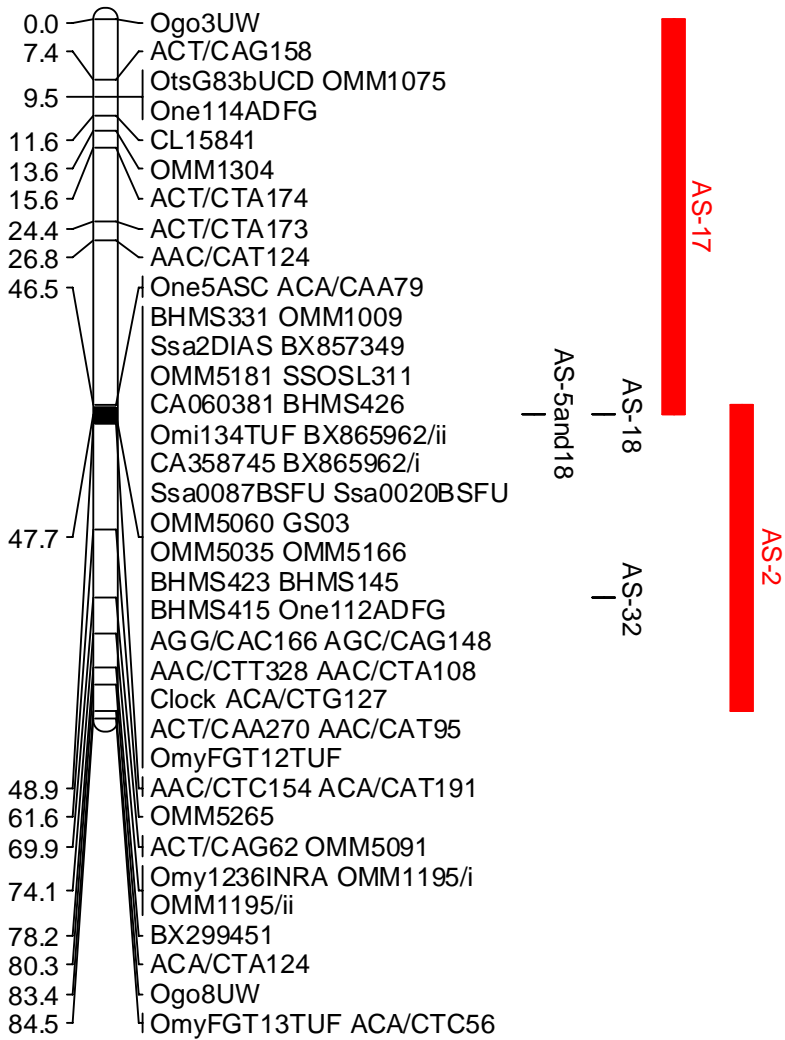

## Chromosome 5

# RT-9f

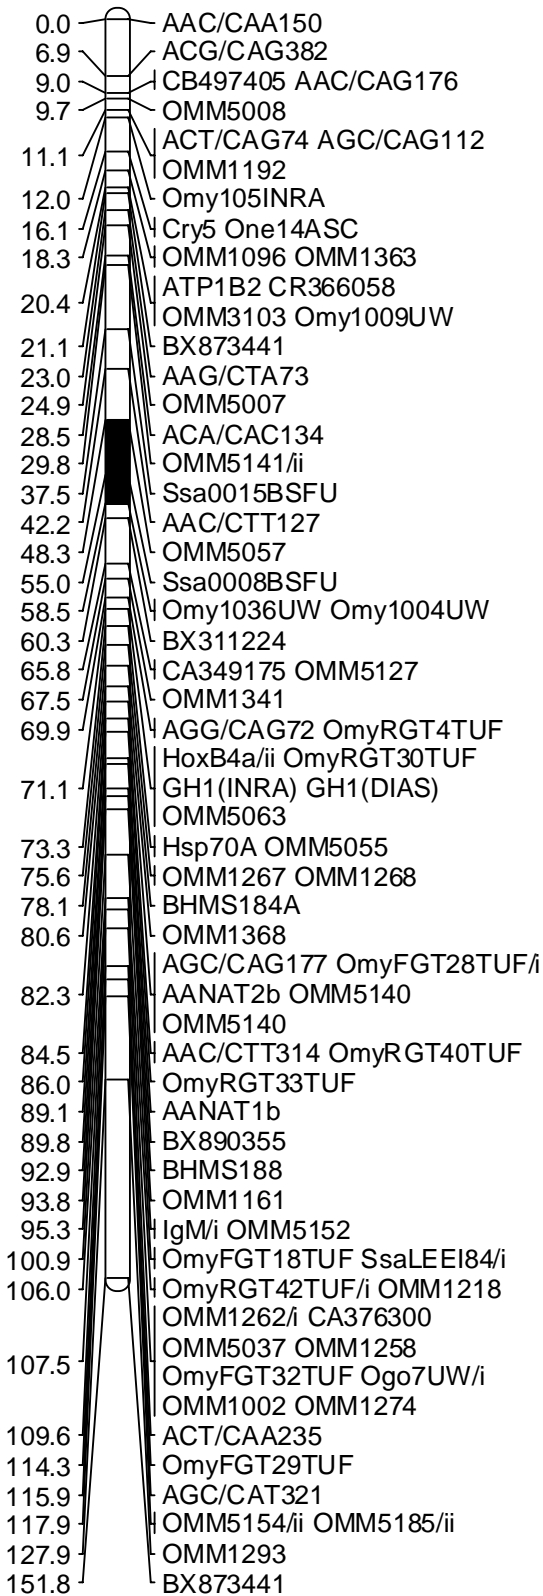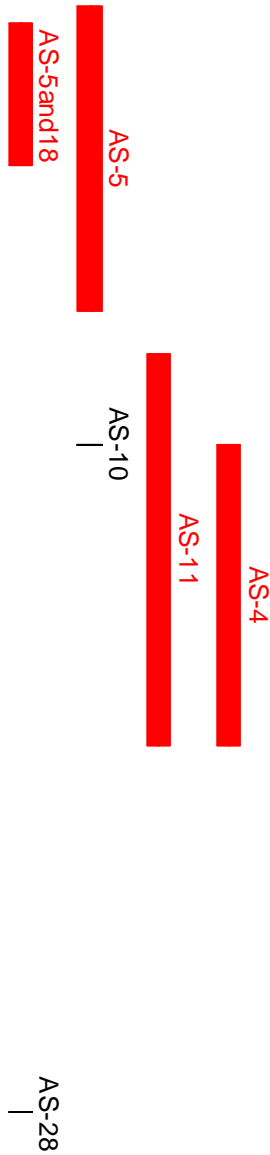

Chromosome 12

## RT-10f

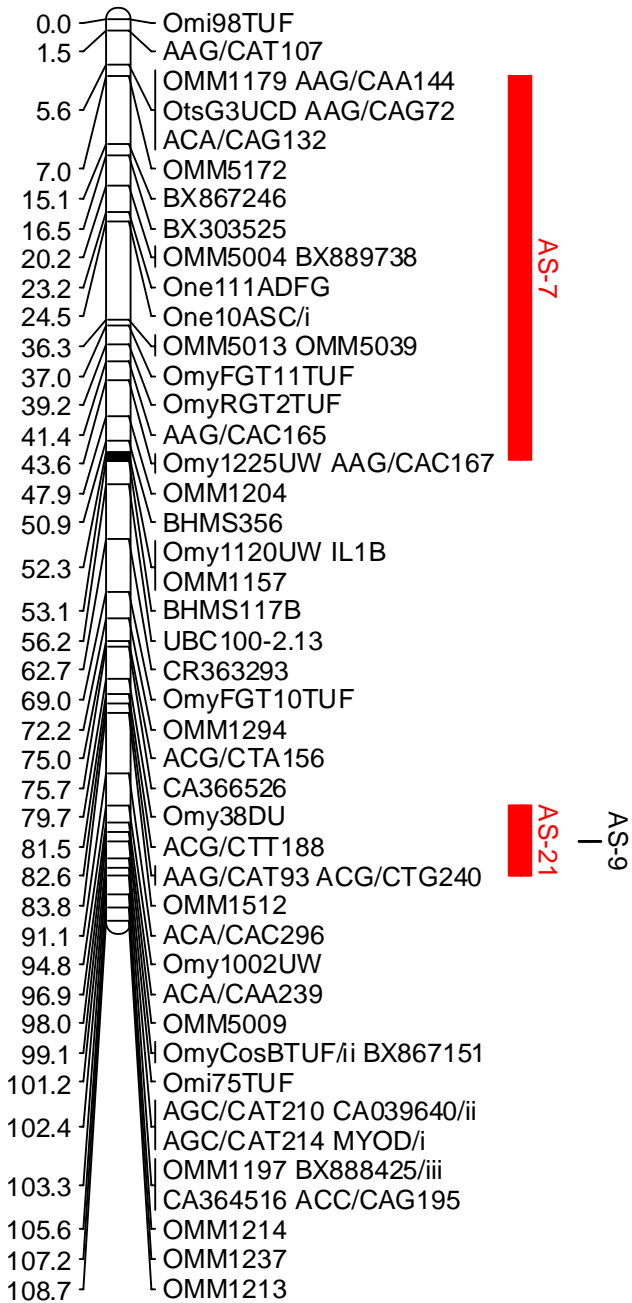

## Chromosome 6

## RT-11f

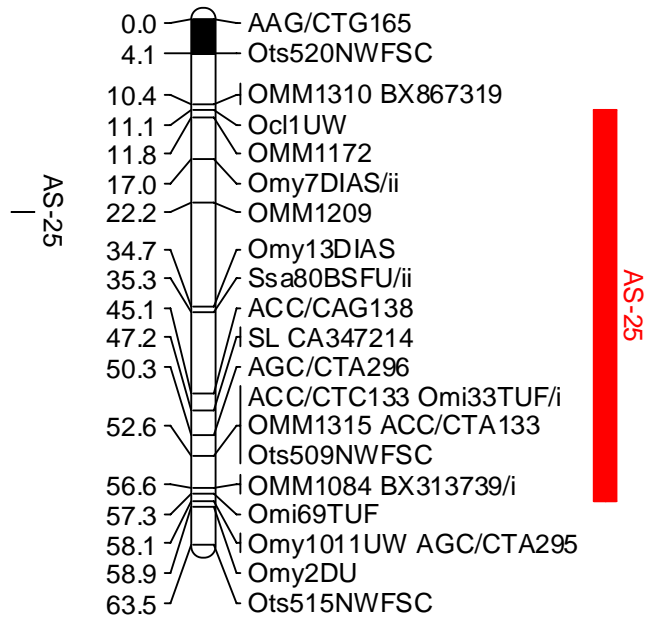

## Chromosome 27

### RT-12f

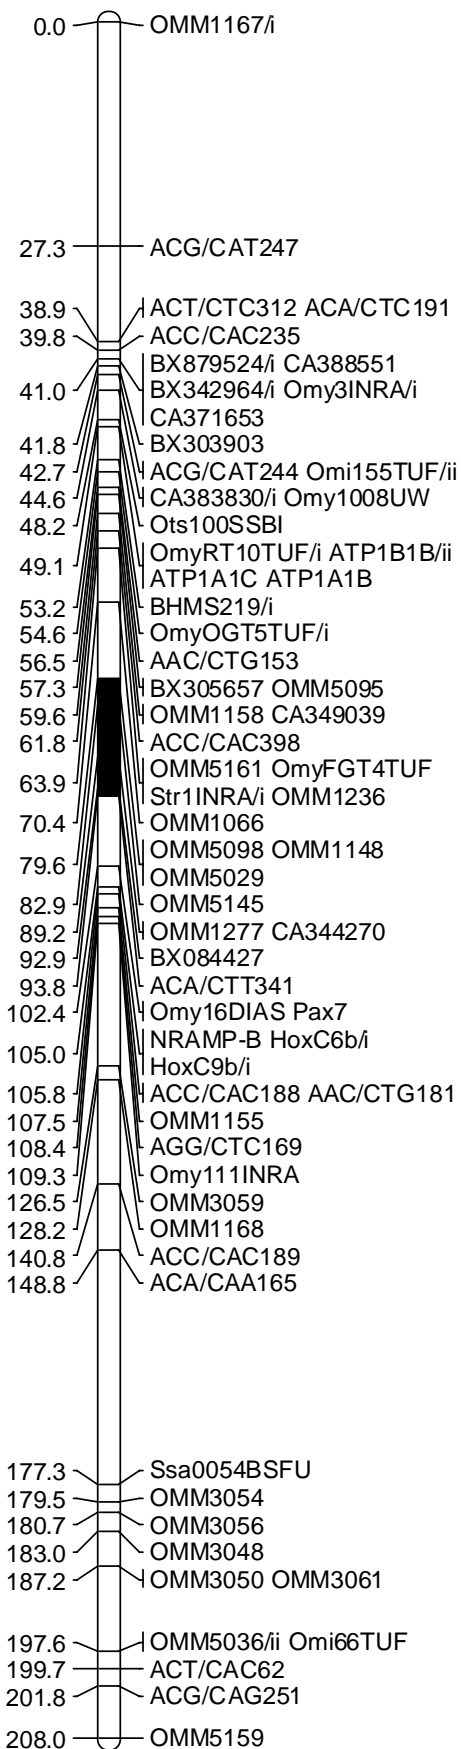

### RT-13f

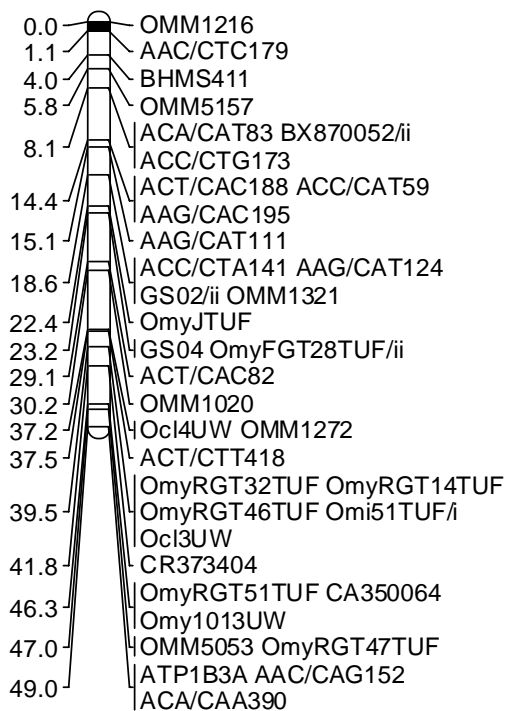

### Chromosome 28

AS-6

### Chromosome 7

AS-10

AS-23

AS-22

AS-32

AS-3

AS-11



## RT-14f

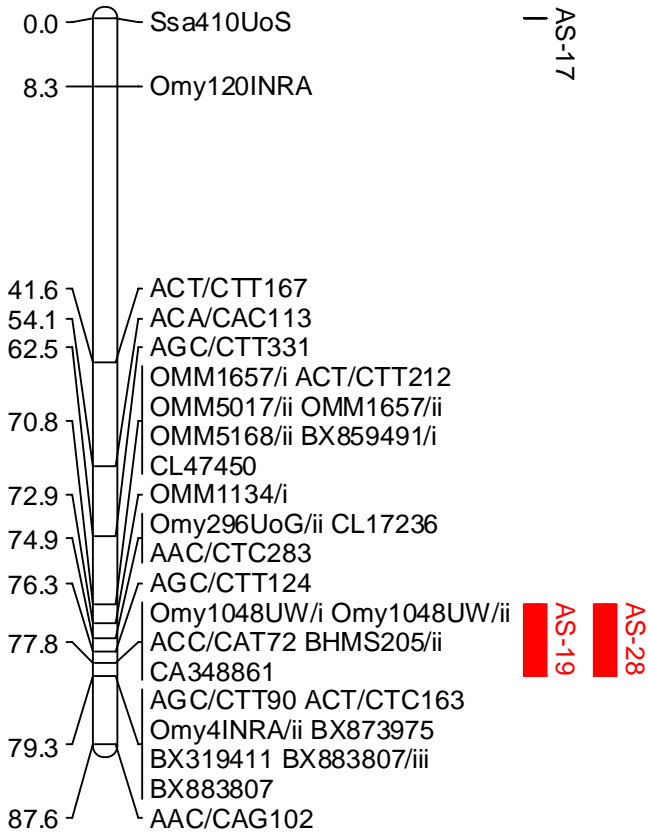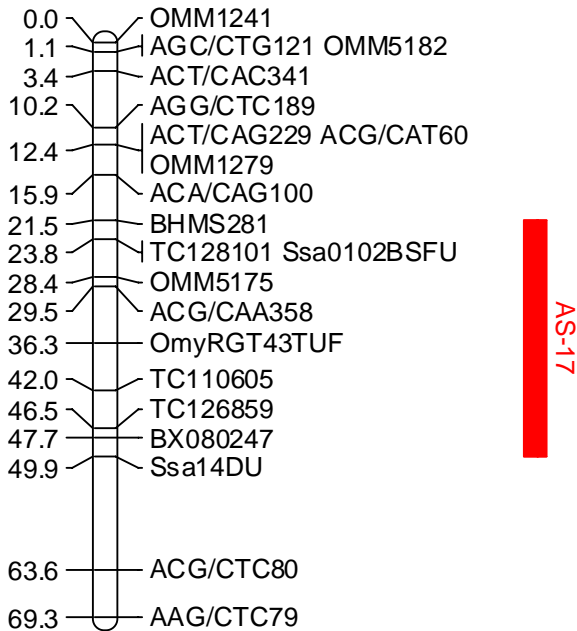

## Chromosome 19

## RT-15f

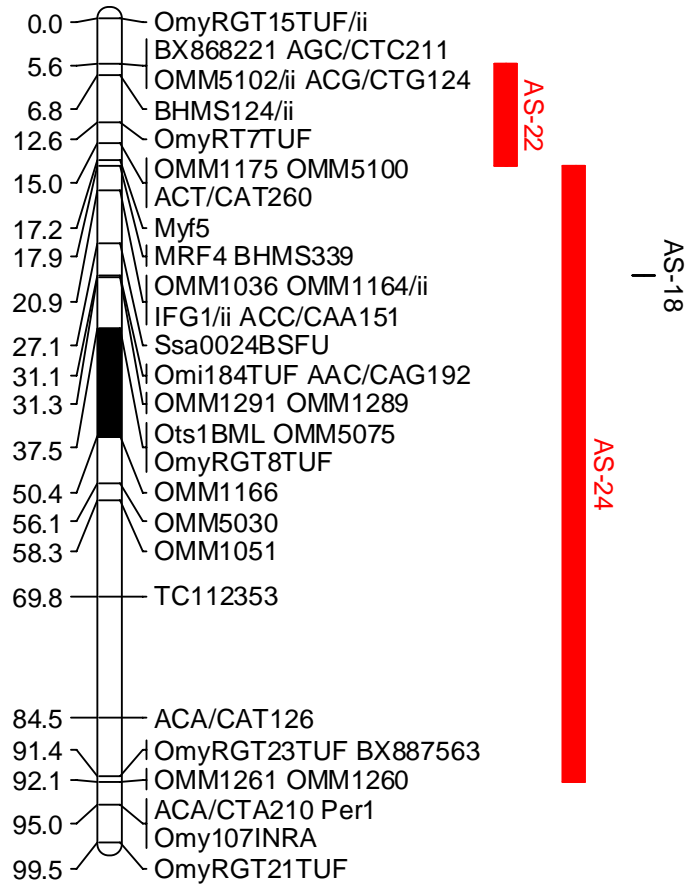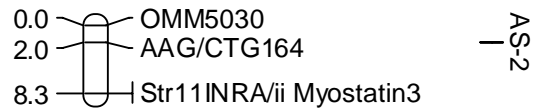

## Chromosome 21

# RT-16

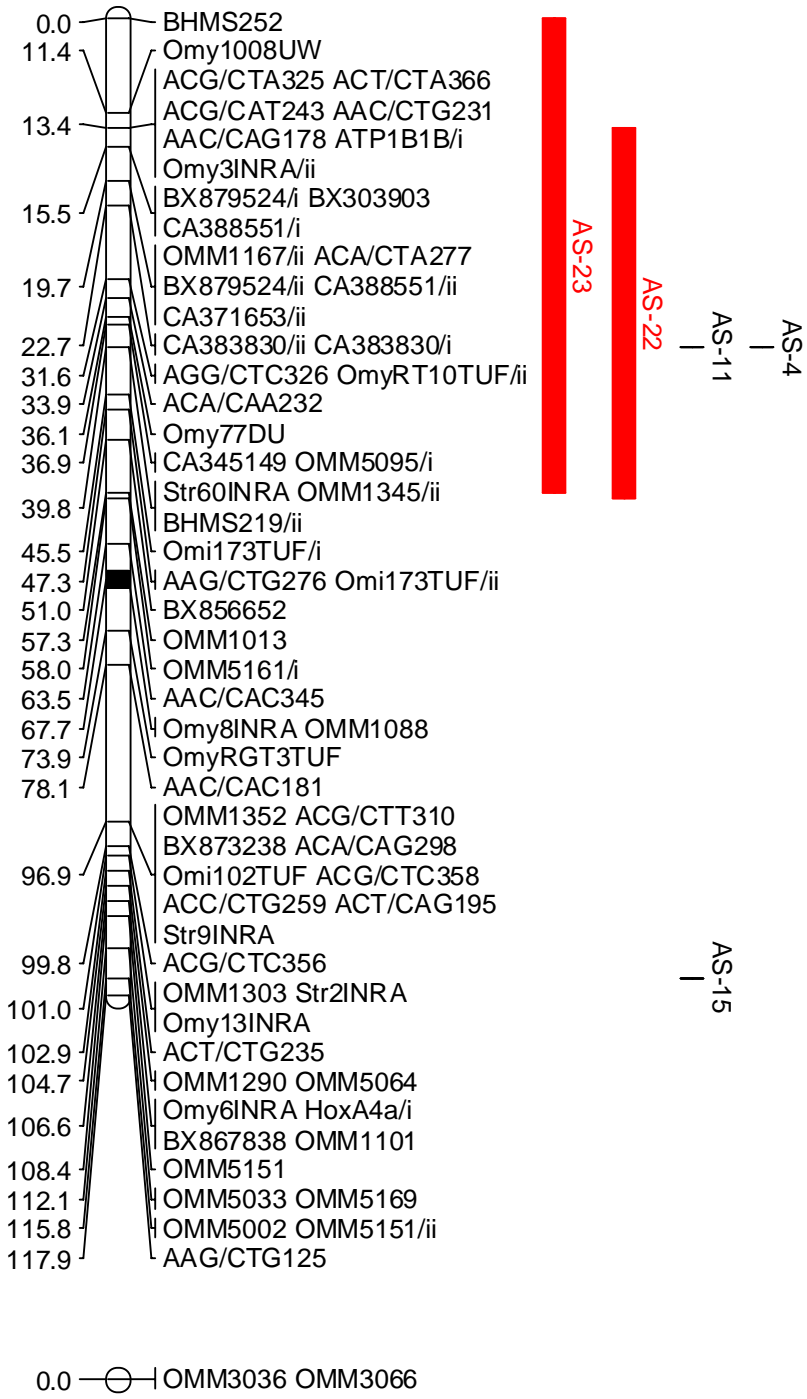

# Chromosome 18

## RT-17f

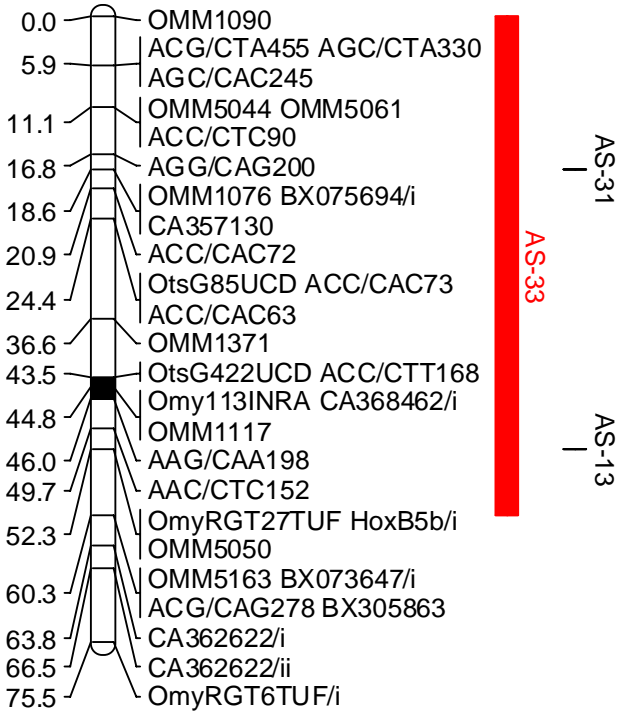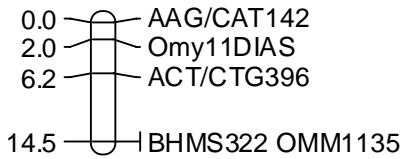

## Chromosome 20

## RT-18f

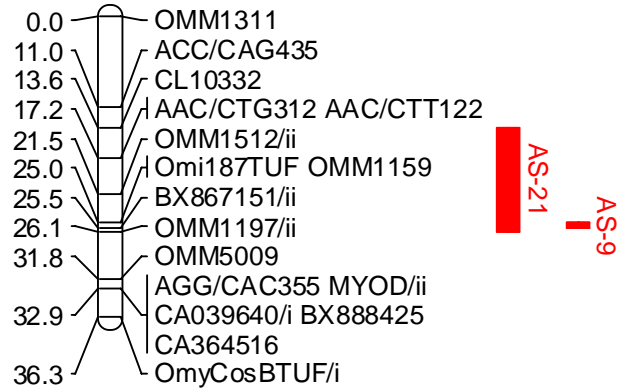

## Chromosome 26

### RT-19f

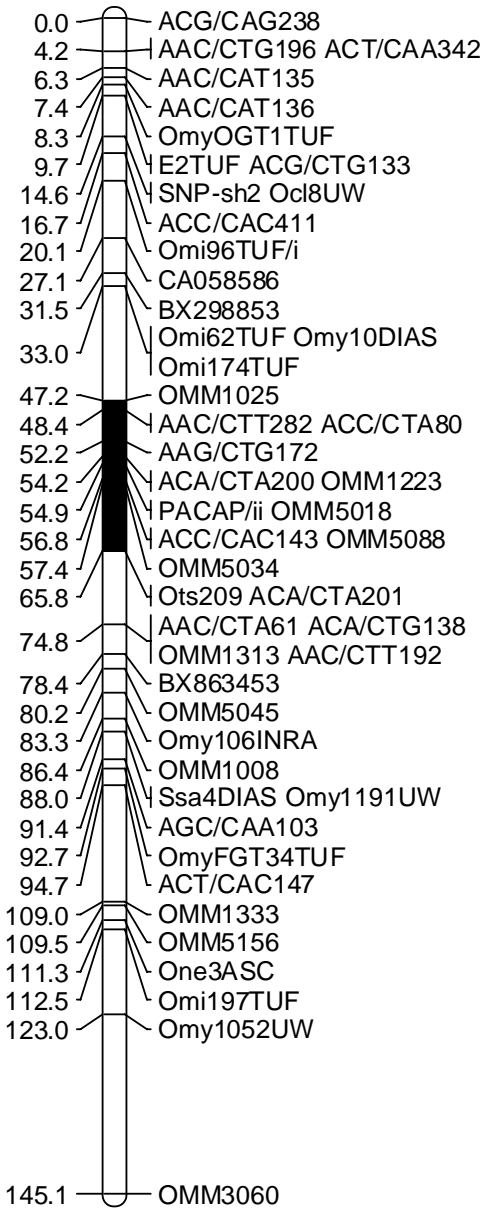

Chromosome 11

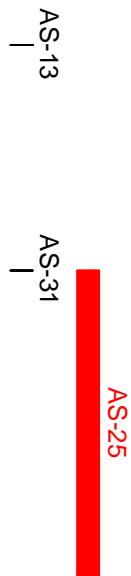

### RT-20f

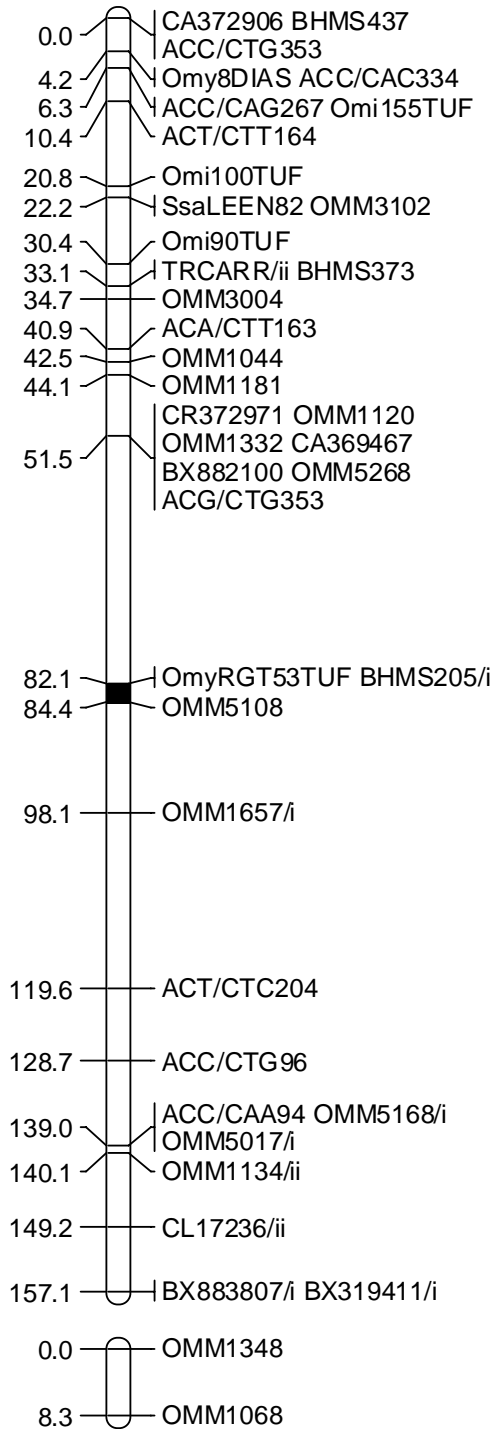

Chromosome 10

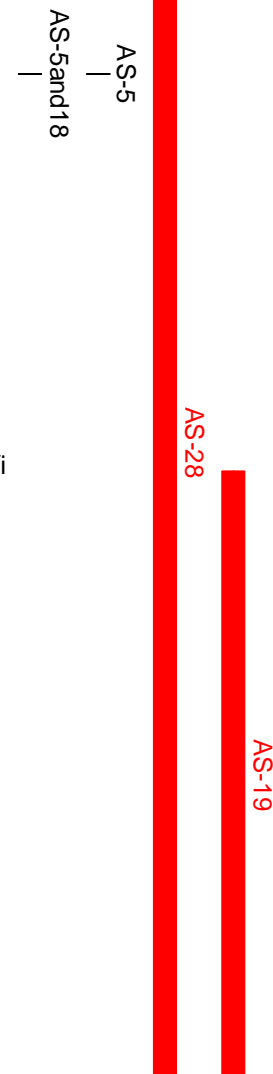

## RT-21f

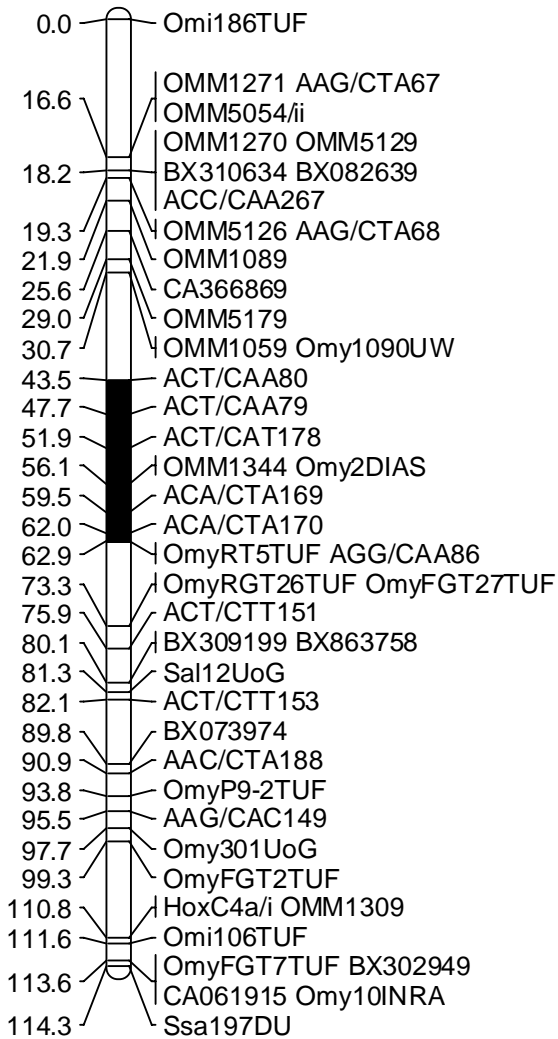

## Chromosome 9

## RT-22f

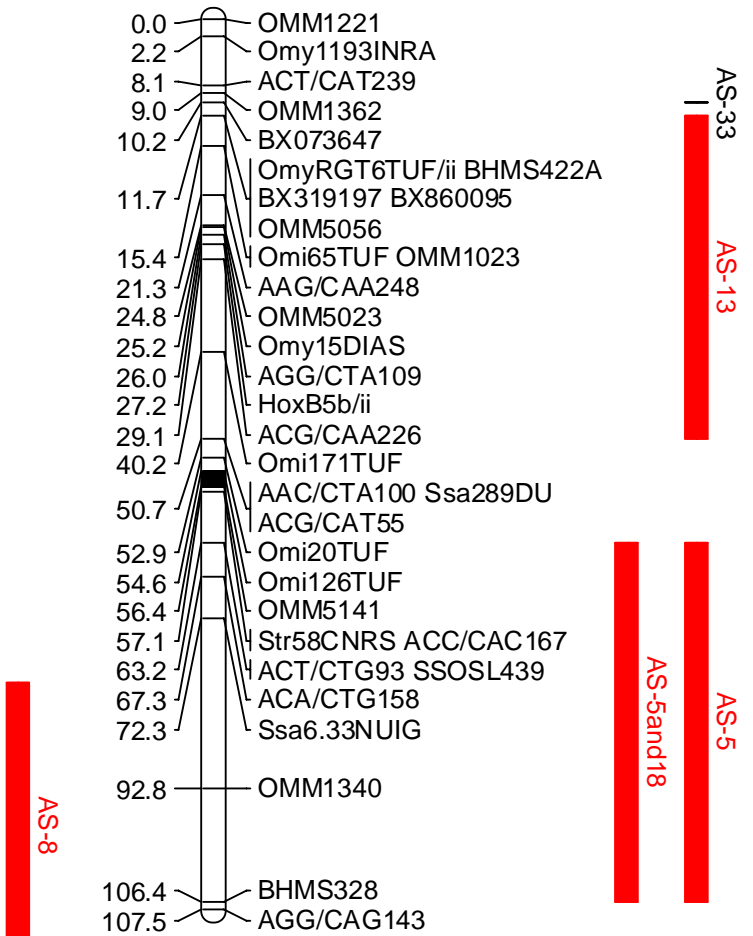

## Chromosome 16

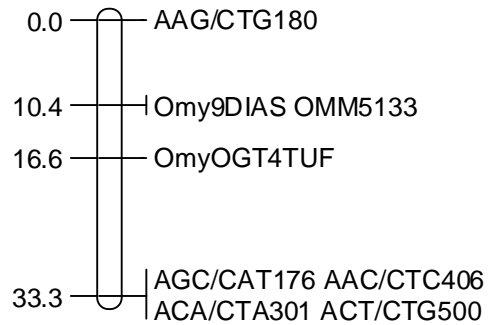

### RT-23f

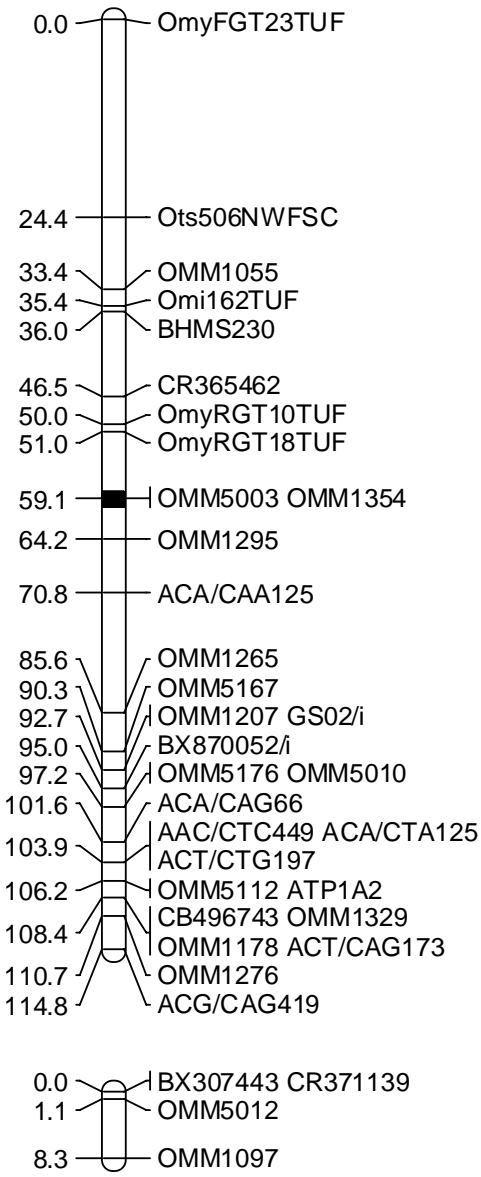

### Chromosome 8

### RT-24f

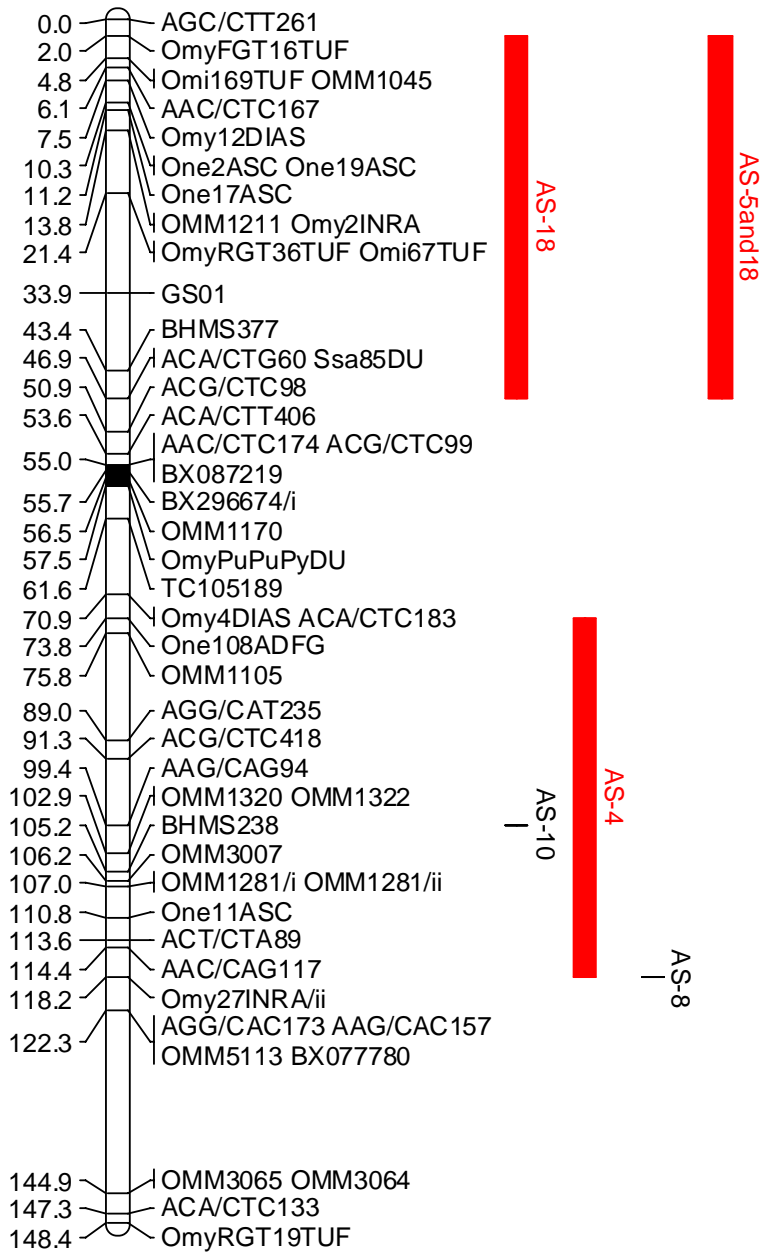

### Chromosome 4

# RT-25f

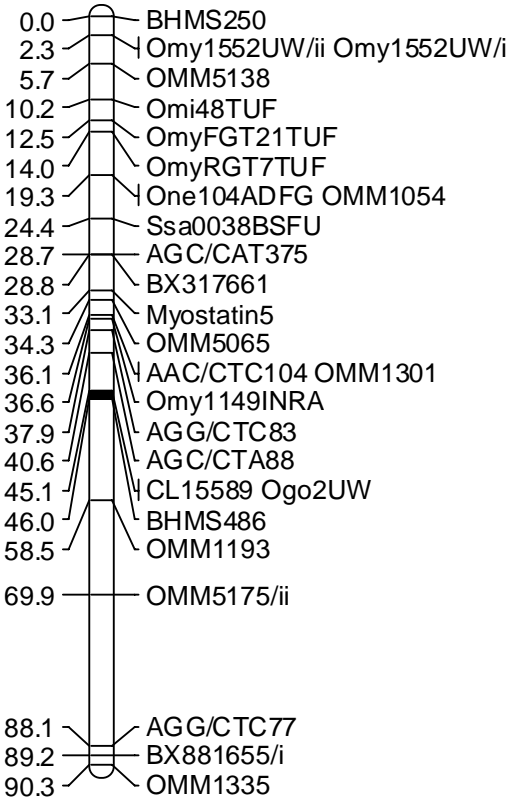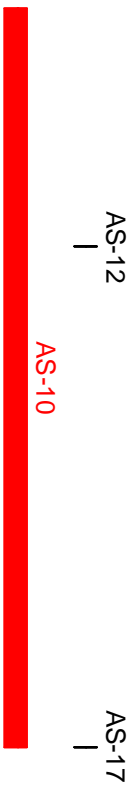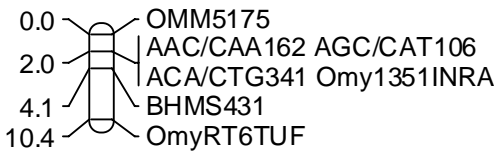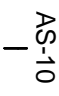

# Chromosome 4+29

# RT-26f

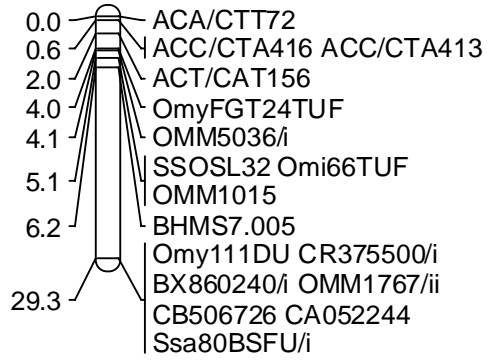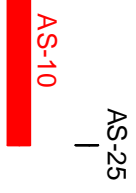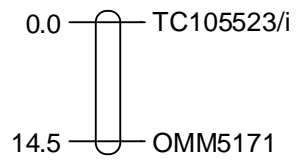

# Chromosome 24

## RT-27f

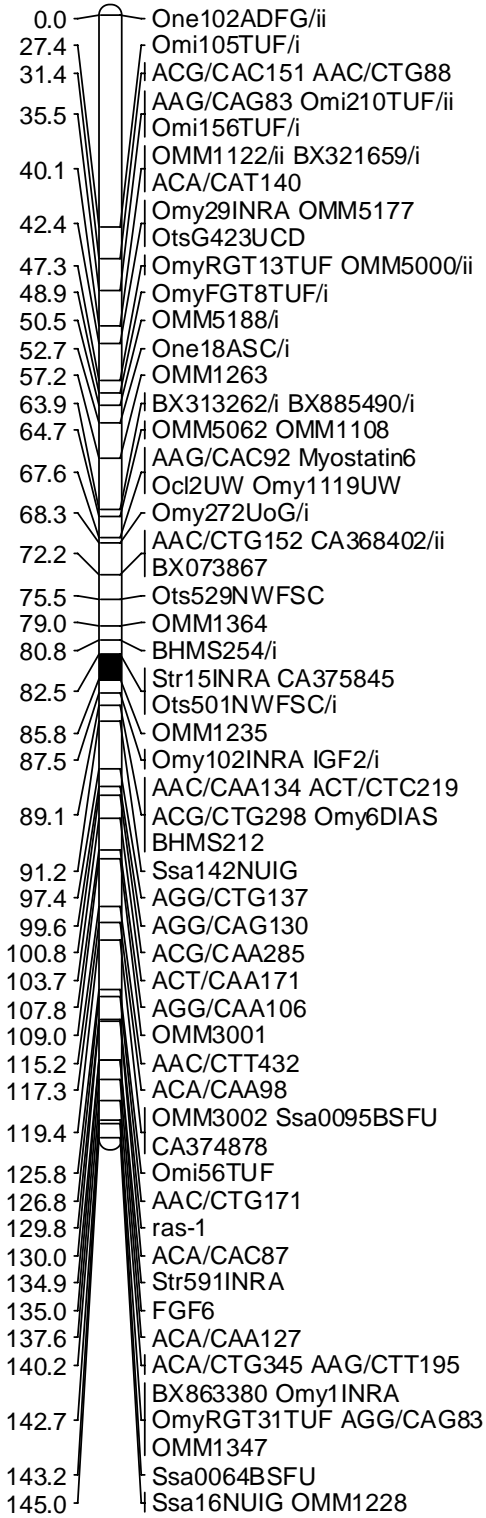

0.0 —○— OMM5062 AAC/CAC106

## Chromosome 2

## RT-29f

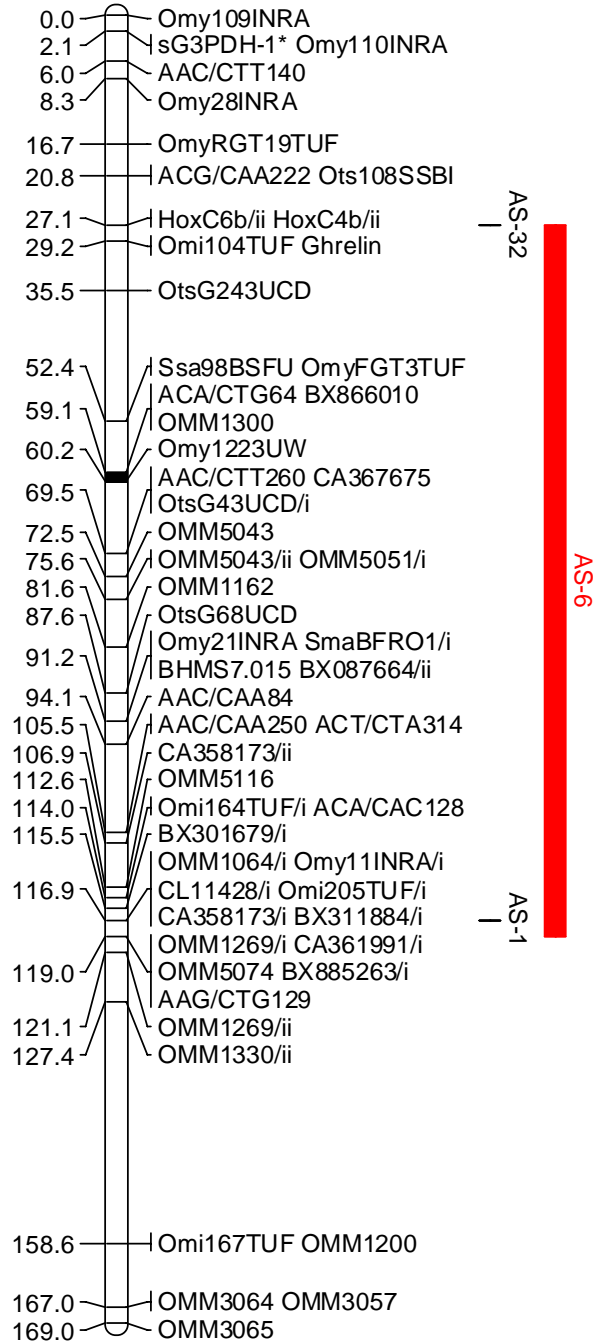

## Chromosome 17



### RT-30f

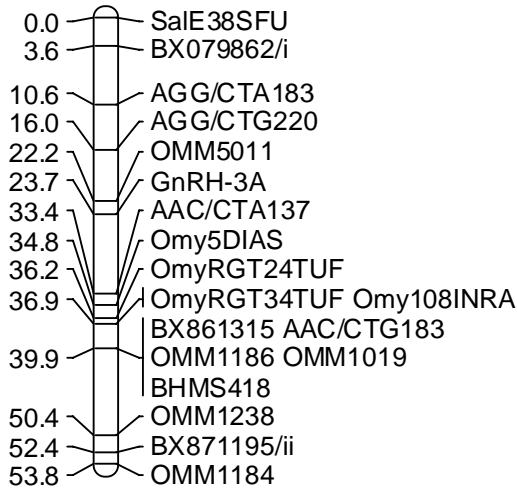

### Chromosome 23

### RT-31f

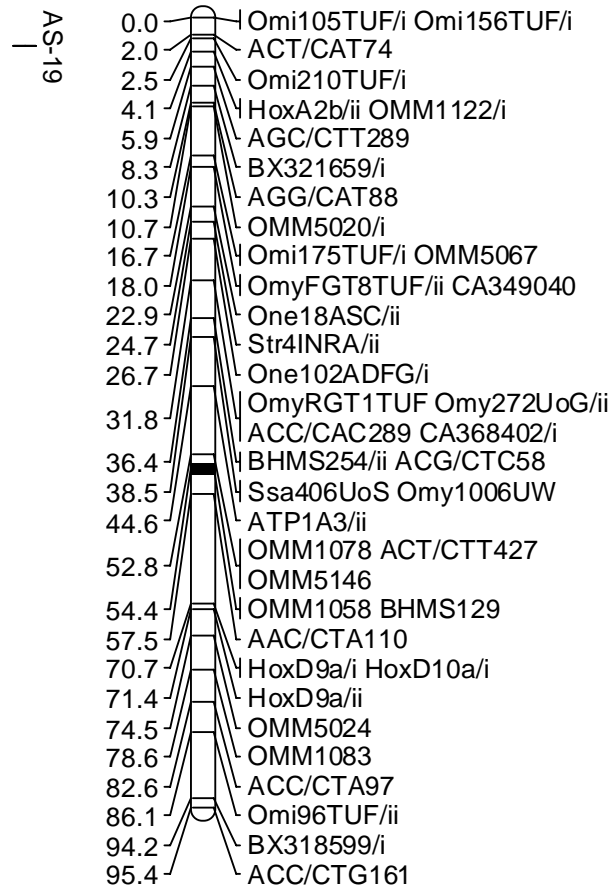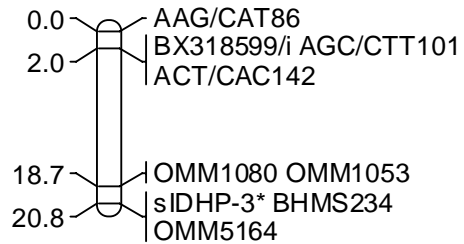

### Chromosome 3

AS-19  
 AS-17

AS-12  
 AS-1

AS-20  
 AS-14

AS-14  
 AS-20
